# Large-Scale Genome-Wide Meta Analysis of Polycystic Ovary Syndrome Suggests Shared Genetic Architecture for Different Diagnosis Criteria.

Felix Day<sup>1§</sup>, Tugce Karaderi<sup>2,3§</sup>, Michelle R. Jones<sup>4§</sup>, Cindy Meun<sup>5§</sup>, Chunyan He<sup>6,7</sup>, Alex Drong<sup>2</sup>, Peter Kraft<sup>8</sup>, Nan Lin<sup>6,7</sup>, Hongyan Huang<sup>8</sup>, Linda Broer<sup>9</sup>, Reedik Magi<sup>10</sup>, Richa Saxena<sup>11</sup>, Triin Laisk-Podar<sup>12,10</sup>, Margrit Urbanek<sup>13,14</sup>, M. Geoffrey Hayes<sup>13,14,15</sup>, Gudmar Thorleifsson<sup>16</sup>, Juan Fernandez-Tajes<sup>2</sup>, Anubha Mahajan<sup>2,17</sup>, Benjamin H. Mullin<sup>18,19</sup>, Bronwyn G.A. Stuckey<sup>18,19,20</sup>, Timothy D. Spector<sup>21</sup>, Scott G. Wilson<sup>18,19,21</sup>, Mark O. Goodarzi<sup>22</sup>, Lea Davis<sup>23,24</sup>, Barbara Obermeyer-Pietsch<sup>25</sup>, André G. Uitterlinden<sup>9</sup>, Verner Anttila<sup>26</sup>, Benjamin M Neale<sup>27,26</sup>, Marjo-Riitta Jarvelin<sup>28,29,30,31</sup>, Bart Fauser<sup>32</sup>, Irina Kowalska<sup>33</sup>, Jenny A. Visser<sup>34</sup>, Marianne Anderson<sup>35</sup>, Ken Ong<sup>1</sup>, Elisabet Stener-Victorin<sup>36</sup>, David Ehrmann<sup>37</sup>, Richard S. Legro<sup>38</sup>, Andres Salumets<sup>39,40,41,42</sup>, Mark I. McCarthy<sup>2,17,43</sup>, Laure Morin-Papunen<sup>44</sup>, Unnur Thorsteinsdottir<sup>16,45</sup>, Kari Stefansson<sup>16,45</sup>, 23andMe Research Team<sup>46</sup>, Unnur Styrkarsdottir<sup>16§</sup>, John Perry<sup>1§</sup>, Andrea Dunai<sup>47,13§</sup>, Joop Laven<sup>5§</sup>, Steve Franks<sup>48§</sup>, Cecilia M. Lindgren<sup>2§\*</sup>, Corrine K. Welt<sup>49,50§\*</sup>

§These authors contributed equally to the work.

\*Corresponding authors

<sup>1</sup> MRC Epidemiology Unit, University of Cambridge, United Kingdom

<sup>2</sup> The Wellcome Trust Centre for Human Genetics, University of Oxford, Oxford, UK

<sup>3</sup> Department of Biological Sciences, Faculty of Arts and Sciences, Eastern Mediterranean University, Famagusta, Cyprus

<sup>4</sup> Center for Bioinformatics & Functional Genomics, Department of Biomedical Sciences, Cedars-Sinai Medical Center, Los Angeles, CA.

<sup>5</sup> Division of Reproductive Endocrinology and Infertility, Department of Obstetrics and Gynaecology, Erasmus University Medical Centre, Rotterdam, The Netherlands

- <sup>6</sup> Department of Internal Medicine, University of Kentucky College of Medicine
- <sup>7</sup> University of Kentucky Markey Cancer Center
- <sup>8</sup> Departments of Epidemiology and Biostatistics, Harvard T.H. Chan School of Public Health
- <sup>9</sup> Department of Internal Medicine, Erasmus University Medical Centre, Rotterdam, The Netherlands
- <sup>10</sup> Estonian Genome Center, University of Tartu, Tartu, Estonia
- <sup>11</sup> Broad Institute of Harvard and MIT and Massachusetts General Hospital, Harvard Medical School, Boston, United States of America
- <sup>12</sup> Department of Obstetrics and Gynaecology, University of Tartu, Estonia
- <sup>13</sup> Division of Endocrinology, Metabolism, and Molecular Medicine, Department of Medicine, Northwestern University Feinberg School of Medicine, Chicago, Illinois
- <sup>14</sup> Center for Genetic Medicine, Northwestern University Feinberg School of Medicine, Chicago, Illinois
- <sup>15</sup> Department of Anthropology, Northwestern University, Evanston, Illinois
- <sup>16</sup> deCODE genetics/Amgen, Reykjavik, Iceland
- <sup>17</sup> Oxford Centre for Diabetes, Endocrinology and Metabolism, University of Oxford, Oxford
- <sup>18</sup> Department of Endocrinology & Diabetes, Sir Charles Gairdner Hospital, Nedlands, Western Australia
- <sup>19</sup> School of Medicine and Pharmacology, University of Western Australia, Crawley, Western Australia
- <sup>20</sup> Keogh Institute for Medical Research, Nedlands. Western Australia
- <sup>21</sup> Department of Twin Research & Genetic Epidemiology, King's College London, London, UK
- <sup>22</sup> Division of Endocrinology, Diabetes and Metabolism, Department of Medicine, Cedars-Sinai Medical Center, Los Angeles, USA
- <sup>23</sup> Department of Medicine, Division of Genetic Medicine, Vanderbilt University Medical Center, Nashville, Tennessee, United States of America
- <sup>24</sup> Vanderbilt Genomics Institute, Vanderbilt University Medical Center, Nashville, TN
- <sup>25</sup> Division of Endocrinology and Diabetology, Department of Internal Medicine Medical University of Graz, Austria
- <sup>26</sup> Stanley Center for Psychiatric Genetics, Broad Institute of MIT and Harvard, Cambridge, Massachusetts, USA.
- <sup>27</sup> Massachusetts General Hospital and Harvard Medical School, Boston, USA
- <sup>28</sup> Department of Epidemiology and Biostatistics, MRC-PHE Centre for Environment and Health, School of Public Health, Imperial College London, London, United Kingdom
- <sup>29</sup> Center for Life Course Health Research, Faculty of Medicine, University of Oulu, 90014 Oulu, Finland
- <sup>30</sup> Biocenter Oulu, P.O. Box 5000, Aapistie 5A, FI-90014, University of Oulu, Finland
- <sup>31</sup> Unit of Primary Care, Oulu University Hospital, Kajaanintie 50, P.O. Box 20, FI-90220 Oulu 90029 OYS, Finland
- <sup>32</sup> Department of Reproductive Medicine and Gynaecology, University Medical Center Utrecht, The Netherlands
- <sup>33</sup> Department of Internal Medicine and Metabolic Disorders, Medical University of Białystok, Białystok, Poland
- <sup>34</sup> Department of Internal Medicine, Section of Endocrinology, Erasmus University Medical Centre, Rotterdam, The Netherlands
- <sup>35</sup> Odense University Hospital, University of Southern Denmark, 5000 Odense C, Denmark
- <sup>36</sup> Department of Physiology and Pharmacology, Karolinska Institutet, Stockholm, Sweden

- <sup>37</sup> Department of Medicine, Section of Adult and Paediatric Endocrinology, Diabetes, and Metabolism, The University of Chicago, Illinois, United States of America
- <sup>38</sup> Department of Obstetrics and Gynecology and Public Health Sciences, Penn State University College of Medicine, Hershey, Pennsylvania, United States of America
- <sup>39</sup> Competence Centre on Health Technologies, Tartu, Estonia
- <sup>40</sup> Institute of Clinical Medicine, Department of Obstetrics and Gynecology, University of Tartu, Tartu, Estonia
- <sup>41</sup> Institute of Bio- and Translational Medicine, University of Tartu, Tartu, Estonia
- <sup>42</sup> Department of Obstetrics and Gynecology, University of Helsinki and Helsinki University Hospital, Helsinki
- <sup>43</sup> Oxford NIHR Biomedical Research Centre, Churchill Hospital, Oxford, UK.
- <sup>44</sup> Department of Obstetrics and Gynecology, University of Oulu and Oulu University Hospital, Medical Research Center, PEDEGO Research Unit, Oulu, Finland
- <sup>45</sup> Faculty of Medicine, University of Iceland, 101 Reykjavik, Iceland
- <sup>46</sup> 23andMe, Inc., Mountain View, CA, 94041
- <sup>47</sup> Division of Endocrinology, Diabetes and Bone Disease, Icahn School of Medicine at Mount Sinai, New York, NY 10029
- <sup>48</sup> Institute of Reproductive & Developmental Biology, Department of Surgery & Cancer, Imperial College London, London, United Kingdom
- <sup>49</sup> Division of Endocrinology, Metabolism and Diabetes, University of Utah, Salt Lake City, UT, 84112
- <sup>50</sup> Reproductive Endocrine Unit, Massachusetts General Hospital, Boston, Massachusetts

## Abstract

Polycystic ovary syndrome (PCOS) is a disorder characterized by hyperandrogenism, ovulatory dysfunction and polycystic ovarian morphology. Affected women frequently have metabolic disturbances including insulin resistance and dysregulation of glucose homeostasis. PCOS is diagnosed with two different sets of diagnostic criteria, resulting in a phenotypic spectrum of PCOS cases. The genetic similarities between cases diagnosed with different criteria have been largely unknown. Previous studies in Chinese and European subjects have identified 16 loci associated with risk of PCOS. We report a meta-analysis from 10,074 PCOS cases and 103,164 controls of European ancestry and characterisation of PCOS related traits. We identified 3 novel loci (near *PLGRKT*, *ZBTB16* and *MAPRE1*), and provide replication of 11 previously reported loci. Identified variants were associated with hyperandrogenism, gonadotropin regulation and testosterone levels in affected women. Genetic correlations with obesity, fasting insulin, type 2 diabetes, lipid levels and coronary artery disease indicate shared genetic architecture between metabolic traits and PCOS. Mendelian randomization analyses suggested variants associated with body mass index, fasting insulin, menopause timing, depression and male-pattern balding play a causal role in PCOS. Only one locus differed in its association by diagnostic criteria, otherwise the genetic architecture was similar between PCOS diagnosed by self-report and PCOS diagnosed by NIH or Rotterdam criteria across common variants at 13 loci.

Polycystic ovary syndrome (PCOS) is the most common endocrine disorder in reproductive aged women, with a complex pattern of inheritance<sup>1-5</sup>. Two different diagnostic criteria based on expert opinion have been utilized: The National Institutes of Health (NIH) criteria require hyperandrogenism (HA) and ovulatory dysfunction (OD)<sup>6</sup> while the Rotterdam criteria include the presence of polycystic ovarian morphology (PCOM) and requires at least two of three traits to be present, resulting in four phenotypes (**Supplementary Figure 1**)<sup>6,7</sup>. PCOS by NIH criteria has a prevalence of ~7% in reproductive age women worldwide<sup>8</sup>; the use of the broader Rotterdam criteria increases this to 15-20% across different populations<sup>9-11</sup>.

PCOS is commonly associated with insulin resistance, pancreatic beta cell dysfunction, obesity and type 2 diabetes (T2D). These metabolic abnormalities are most pronounced in women with the NIH phenotype<sup>12</sup>. In addition, the odds for moderate or severe depression and anxiety disorders are higher in women with PCOS<sup>13</sup>. However, the mechanisms behind the association between the reproductive, metabolic and psychiatric features of the syndrome remain largely unknown.

Genome-wide association studies (GWAS) in women of Han Chinese and European ancestry have reproducibly identified 16 loci<sup>14-17</sup>. The observed susceptibility loci in PCOS appeared to be shared between NIH criteria and self-reported diagnosis<sup>17</sup>, which is particularly intriguing. Genetic analyses of causality (by Mendelian Randomization analysis) among women of European ancestry with self-reported PCOS suggested that body mass index (BMI), insulin resistance, age at menopause and sex hormone binding globulin contribute to disease pathogenesis<sup>17</sup>.

We performed the largest GWAS meta-analysis of PCOS to date, in 10,074 cases and 103,164 controls of European ancestry diagnosed with PCOS according to the NIH (2,540 cases and 15,020 controls) or Rotterdam criteria (2,669 cases and 17,035 controls), or by self-reported diagnosis (5,184 cases and 82,759 controls) (**Table 1** and **Supplementary Table 1**). We investigated whether there were differences in the genetic architecture across the diagnostic criteria, and whether there were distinctive susceptibility loci associated with the cardinal features of PCOS; HA, OD and PCOM. Further, we explored the genetic architecture with a range of phenotypes related to the biology of PCOS, including male-pattern balding<sup>18-21</sup>.

We identified 14 genetic susceptibility loci associated with PCOS, adjusting for age, at the genome-wide significance level ( $P < 5.0 \times 10^{-8}$ ) bringing the total number of PCOS associated loci to nineteen (**Table 2, Figure 1**). Three of these loci were novel associations (near *PLGRKT*, *ZBTB16* and *MAPRE1*, respectively; shown in bold in **Table 2**). Six of the 11 reported associations were previously observed in Han Chinese PCOS women<sup>14,15</sup>. Eight loci have been reported in European PCOS cohorts<sup>16,17</sup>. Obesity is commonly associated with PCOS and in most of the cohorts cases were heavier than controls (**Table 1**). However, adjusting for both age and BMI did not identify any novel loci; and the 14 loci remained genome-wide significant. Only one SNP near *GATA4/NEIL2* showed significant evidence of heterogeneity across the different diagnostic groups (**Figure 2; Table 2**, rs804279, Het  $P=2.9 \times 10^{-4}$ ). For this SNP, the largest effect was seen in NIH cases and the smallest in self-reported cases. Credible set analysis, which prioritises variants in a given locus with regards to being potentially causal, was able to reduce the plausible interval for the causal variant(s) at many loci (**Supplementary Table 2**). Of note, 95% of the signal at the *THADA* locus came from two SNPs. Examination of previously published genome-wide significant loci from Han Chinese PCOS<sup>14,15</sup> demonstrated that index variants from the *THADA*, *FSHR*, *C9orf3*, *YAP1* and *RAB5B* loci were significantly associated

with PCOS after Bonferroni correction for multiple testing in our European ancestry subjects (**Supplementary Table 3**).

We assessed the association of the PCOS susceptibility variants identified in the GWAS meta-analysis with the PCOS related traits: HA, OD, PCOM, testosterone, FSH and LH levels, and ovarian volume in PCOS cases (**Table 3, Supplementary Figure 2 and Supplementary Table 4**). We found four variants associated with HA, eight variants associated with PCOM and nine variants associated with OD. Of the eight loci associated with PCOM, seven were also associated with OD. Three of the four loci associated with HA were also associated with OD and PCOM. Two additional loci were associated with OD alone, one of which was the locus near *FSHB* (**Supplementary Table 4**). This locus was also associated with LH and FSH levels. There was a single PCOS locus near *IRF1/RAD50* associated with testosterone levels (**Supplementary Table 4**). We repeated this analysis with susceptibility variants reported previously in Han Chinese PCOS cohorts<sup>14,15</sup>. In this analysis, there was one association with HA (near *DENND1A*), three with PCOM and three with OD (**Supplementary Table 3**). A limitation of these analyses is the variable sample size across the phenotypes analysed. Additionally, the known referral bias for the more severely affected NIH phenotype (patients having both OD and HA) may result in more PCOS diagnoses than the other criteria<sup>35</sup>, and may have contributed to the number of associations between the identified PCOS risk loci and these phenotypes.

In the analyses looking at the weighted genetic risk score in the Rotterdam cohort, we observed an increase in the risk for PCOS (**Supplementary Figure 3**). Compared to individuals in the third quintile (reference group), individuals in the top 5th quintile of risk score have an OR of 2.78 (95% CI) for PCOS based on NIH criteria and an OR of 3.39 (95% CI) for Rotterdam criteria based PCOS. Of the associations, only the effect

estimate for the Rotterdam criteria was significant, possibly due to the smaller size available with cases diagnosed according to the NIH criteria. When looking at the area under the ROC curves at SNPs with different P-value thresholds, we found a maximum AUC of 0.54 using SNPs with a P-value  $< 5 \times 10^{-6}$  for both diagnostic criteria. While this is significantly better than chance, it is unlikely that a risk score generated from the variants discovered to date would represent a clinically relevant tool.

LD score regression analysis revealed genetic correlations with childhood obesity, fasting insulin, T2D, HDL, menarche timing, triglyceride levels, cardiovascular diseases and depression (**Table 4**) suggesting that there is shared genetic architecture and biology between these phenotypes and PCOS. There were no genetic correlations with menopause timing or male pattern balding. Mendelian randomization suggested that there was a causal role for BMI, fasting insulin and depression pathways (**Table 5**). Interestingly, while there was no genetic correlation detected for male pattern balding or menopause timing with PCOS, the Mendelian randomization analysis was significant. The importance of BMI pathways on reproductive phenotypes was further demonstrated by the attenuation of significance of Mendelian randomization analysis for age-at-menarche when BMI-associated variants were excluded from the analysis.

We found 14 independent loci significantly associated with the risk for PCOS, including three novel loci. The 11 previously reported loci implicated neuroendocrine and metabolic pathways that may contribute to PCOS (**Supplementary Note 1.1**). Two of the novel loci contain potential endocrine related candidate genes. The locus harbouring rs10739076 contains several interesting candidate genes; *PLGRKT*, a plasminogen receptor and several genes in the insulin superfamily; *INSL6*, *INSL4* and *RLN1*, *RLN2* which are endocrine hormones secreted by the ovary and testis and are suspected to impact follicle growth and ovulation<sup>22</sup>. *ZBTB16* (also known as *PLZF*)



has been marked as an androgen-responsive gene with anti-proliferative activity in prostate cancer cells<sup>23</sup>. *PLZF* activates *GATA4* gene transcription and mediates cardiac hypertrophic signalling from the angiotensin II receptor 2<sup>24</sup>. Furthermore, *PLZF* is upregulated during adipocyte differentiation *in vitro*<sup>25</sup> and is involved in control of early stages of spermatogenesis<sup>26</sup> and endometrial stromal cell decidualization<sup>27</sup>. The third novel locus harbours a metabolic candidate gene; *MAPRE1* (interacts with the low-density lipoprotein receptor related protein 1 (LRP1), which controls adipogenesis<sup>28</sup> and may additionally mediate ovarian angiogenesis and follicle development<sup>29</sup> (**Supplementary Note 1.2**). Thus, all the new loci contain genes plausibly linked to both the metabolic and reproductive features of PCOS.

We found that there was no significant difference in the association with case status for the majority of the PCOS-susceptibility loci by diagnostic criteria. However, due to lack of power, it was not possible to compare each of the four PCOS phenotypes (Supplementary Figure 1). Cohorts containing both NIH and non-NIH Rotterdam phenotypes were compared to cohorts containing only the NIH phenotype. Although the inclusion of NIH phenotypes in the Rotterdam criteria cohorts could have masked differences in genetic architecture between the NIH and non-NIH Rotterdam phenotypes, the non-NIH Rotterdam subjects made up 53% of the cohorts. It is of considerable interest that the cohort of research participants from the personal genetics company 23andMe, Inc., identified by self-report, had similar risks to the other cohorts where the diagnosis was clinically confirmed. Our findings suggest that the genetic architecture of these PCOS definitions does not differ for common susceptibility variants. If these results are confirmed when the Rotterdam diagnostic subsets are compared (**Supplementary Figure 1**), data should be combined in future efforts to map the genetic architecture and molecular pathways underlying PCOS. Only one locus, *GATA4/NEIL2* (rs804279), was significantly different across diagnostic criteria: most strongly associated in NIH compared to the Rotterdam

phenotype and self-reported cases. Deletion of *GATA4* results in abnormal responses to exogenous gonadotropins and impaired fertility in mice<sup>30</sup>. The locus also encompasses the promoter region of *FDFT1*, the first enzyme in the cholesterol biosynthesis pathway<sup>31</sup>, which is the substrate for testosterone synthesis, and is associated with non-alcoholic fatty liver disease<sup>32</sup>. The major difference between the NIH phenotype and the additional Rotterdam phenotypes is metabolic risk; the NIH phenotype is associated with more severe insulin resistance<sup>33</sup>. rs804279 does not show association with any of the metabolic phenotypes in the T2D diabetes knowledge portal {Type 2 Diabetes Knowledge Portal. [type2diabetesgenetics.org](http://www.type2diabetesgenetics.org). 2015 Feb 1; <http://www.type2diabetesgenetics.org/variantInfo/variantInfo/rs804279>} so it may represent a PCOS-specific susceptibility locus.

The significant association of PCOS GWAS meta-analysis susceptibility variants with the cardinal PCOS related traits OD, HA and PCOM further strengthened the hypothesis that specific variants may confer risk for PCOS through distinct mechanisms. Three variants at the *C9orf3*, *DENND1A*, and *RAB5B* were associated with all PCOS related traits. The findings were consistent with the Han Chinese *DENND1A* variant association with HA, as suggested previously<sup>34</sup>. Thus, these loci, along with *GATA4/NEIL2* (as discussed above) may help identify pathways that link specific PCOS related traits with greater metabolic risk. In contrast, the variants at the *ERBB4*, *YAP1*, and *ZBTB16* loci were strongly associated with OD and PCOM, and therefore, might be more important for links to menstrual cycle regularity and fertility. In addition, the *FSHB* variant was associated with the levels of FSH and LH<sup>16,17</sup>, suggesting that it may act by affecting gonadotropin levels. This variant maps 2kb upstream from open chromatin (identified by DNase-Seq) and an enhancer (identified by peaks for both H3K27Ac and H3K4me1) in a lymphoblastoid cell line from ENCODE, indicating a potential role for a regulatory element ~25kb upstream from

the *FSHB* promoter. Furthermore, the association between the *IRF1/RAD50* variant and testosterone levels may indicate a regulatory role in testosterone production.

Of note, results of the follow-up analysis show a high level of shared biology between PCOS and a range of metabolic outcomes consistent with the previous findings<sup>17</sup>. In particular, there is genetic evidence for increased BMI as a risk factor for PCOS. There is also genetic evidence that fasting insulin might be an independent risk factor, but there might also be pleiotropic effects across the variants given the results from different Mendelian randomization analyses. This study also confirmed a causal association with the pathways that underlie menopause<sup>17</sup>, suggesting that PCOS has shared aetiology with both classic metabolic and reproductive phenotypes. Furthermore, there was an apparent effect of depression-associated variants on the likelihood of PCOS, suggesting a role for psychological factors on hormonally related diseases. However, the links between PCOS and depression might be complicated by pathways that are also related to BMI. In addition, male-pattern balding-associated variants showed strong effects on PCOS, suggesting that this might be a male manifestation of PCOS pathways, as has been previously suggested<sup>18,20,21,36</sup>. This observation may reflect the biology of hair follicle sensitivity to androgens, seen in androgenetic alopecia, a well-recognised feature of HA and PCOS<sup>37,38</sup>. The Mendelian randomization results for male-pattern balding and menopause are significant despite non-significant genetic correlation results, suggesting that the shared aetiology may be specific to only a few key pathways.

In conclusion, the genetic underpinnings of PCOS implicate neuroendocrine, metabolic and reproductive pathways in the pathogenesis of disease. Although specific phenotype stratified analyses are needed, genetic findings were consistent across the diagnostic criteria for all but one susceptibility locus, suggesting a common genetic architecture underlying the different phenotypes. There was genetic evidence

for shared biologic pathways between PCOS and a number of metabolic disorders, menopause, depression and male-pattern balding, a putative male phenotype. Our findings demonstrate the extensive power of genetic and genomic approaches to elucidate the pathophysiology of PCOS.

## **ACKNOWLEDGEMENTS**

We thank the research participants and employees of 23andMe for contributing to this study. EGCUT Computations were performed in High Performance Computing Center, University of Tartu.

## **ACKNOWLEDGEMENT OF FUNDING SOURCES**

This work has been supported by; MRC grant MC\_U106179472 (F.D.), Samuel Oschin Comprehensive Cancer Institute Developmental Funds, Center for Bioinformatics and Functional Genomics and Department of Biomedical Sciences Developmental Funds (M.R.J.), NCI P30CA177558 (C.H.), NCI UM1CA186107 (P.K.), European Regional Development Fund (Project No. 2014-2020.4.01.15-0012) and the European Union's Horizon 2020 research and innovation program under grant agreements No 692065 (T.L., R.M. A.S.) and 692145 (R.M.), NICHD R01HD065029 (R.S.), Estonian Ministry of Education and Research (grant IUT34-16) (T.L.), NICHD R01HD057450, P50HD044405 (M.U., M.G.H, A.D.), NICHD R01HD057223, R01HD085227 (M.G.H. A.D.), deCode Genetics (G.T. U.T., K.S., U.S.), Raine Medical Research Foundation Priming Grant (B.H.M.), NIHR BRC , Wellcome Trust, MRC (T.S.), NIDDK U01DK094431, U01DK048381 (D.E.), NICHD U10HD38992 (R.L.), Estonian Ministry of Education and Research (grant IUT34-16), Enterprise Estonia (grant EU48695); the EU-FP7 Marie Curie Industry-Academia Partnerships and Pathways (IAPP, grant SARM, EU324509) (A.S.), Wellcome (090532, 098381, 203141); European Commission (ENGAGE: HEALTH-F4-2007-201413) (M.McC.), MRC G0802782, MR/M012638/1 (S.F.), NICHD R01HD065029, ADA 1-10-CT-57 ,

Harvard Clinical and Translational Science Center, from the National Center for Research Resources 1UL1 RR025758 (C.W.).

## **ADDITIONAL AUTHOR INFORMATION**

### **23andMe RESEARCH TEAM**

Michelle Agee, Babak Alipanahi, Adam Auton, Robert K. Bell, Katarzyna Bryc, Sarah L. Elson, Pierre Fontanillas, Nicholas A. Furlotte, David A. Hinds, Karen E. Huber, Aaron Kleinman, Nadia K. Litterman, Matthew H. McIntyre, Joanna L. Mountain, Elizabeth S. Noblin, Carrie A.M. Northover, Steven J. Pitts, J. Fah Sathirapongsasuti, Olga V. Sazonova, Janie F. Shelton, Suyash Shringarpure, Chao Tian, Joyce Y. Tung, Vladimir Vacic, Catherine H. Wilson.

### **COI statement**

Members of the 23andMe Research team are employees of and hold stock or stock options in 23andMe, Inc. G.T., U.T., K.S., U.S., are employees of deCODE genetics/Amgen Inc. MMcC serves on advisory panels for Pfizer and NovoNordisk; has received honoraria from Pfizer, NovoNordisk and EliLilly; and received research funding from Pfizer, NovoNordisk, EliLilly, AstraZeneca, Sanofi Aventis, Boehringer Ingelheim, Merck, Roche, Janssen, Takeda, Servier. J.L. has received consultancy fees from Danone, Metagenics inc., Titus Healthcare, Roche and Euroscreen. C.W. is a consultant for Novartis and has received UptoDate royalties.

## TABLES AND FIGURES.

**Figure 1.** Manhattan plot indicating genome-wide significant variants. The X axis indicates the chromosome depicted by alternating black and grey. The Y axis indicates the inverse log10 of the p-value ( $-\log_{10}(p)$ ). The line designates the minimum p-value for genome-wide significance.

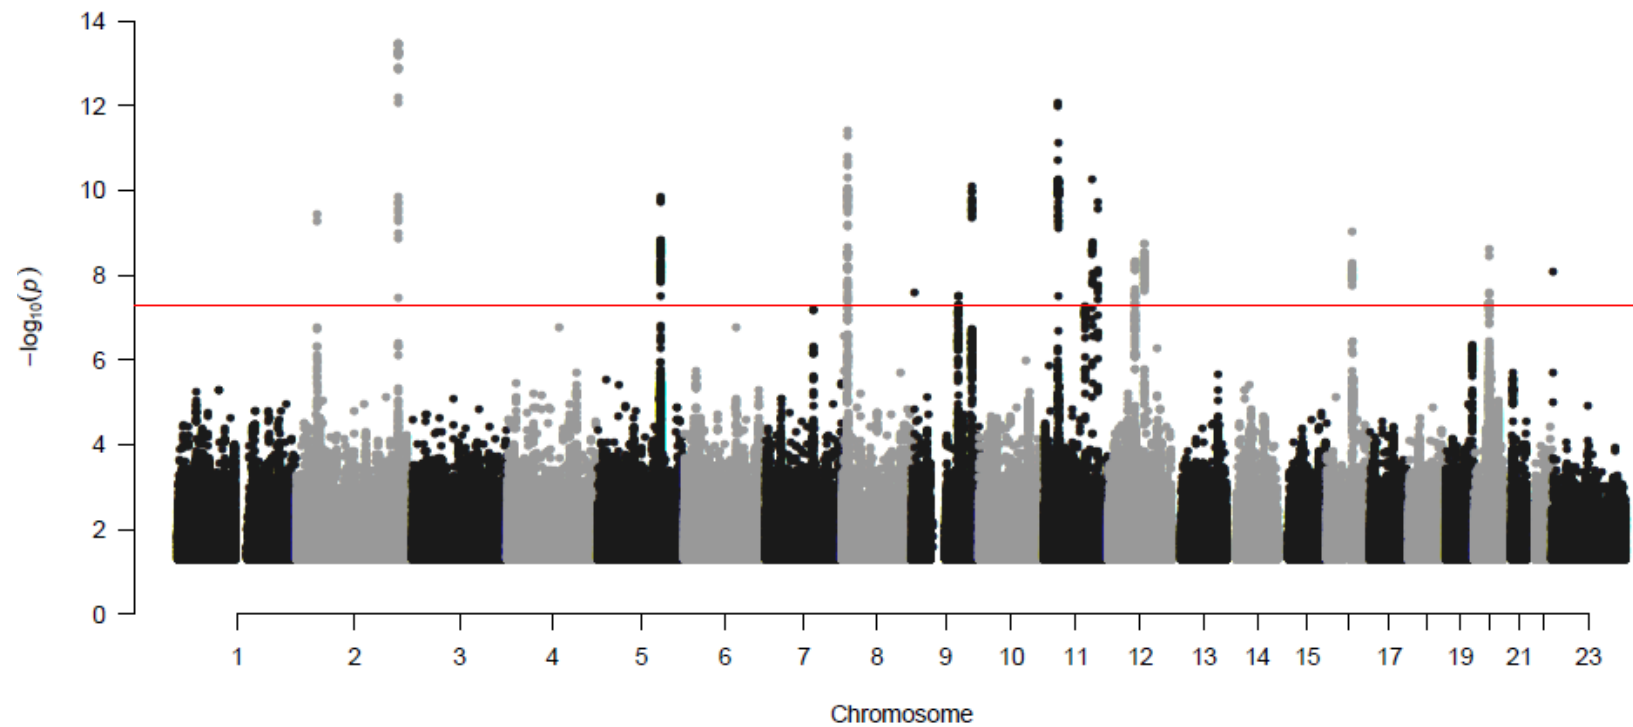

# Analysis

OR [95% CI]

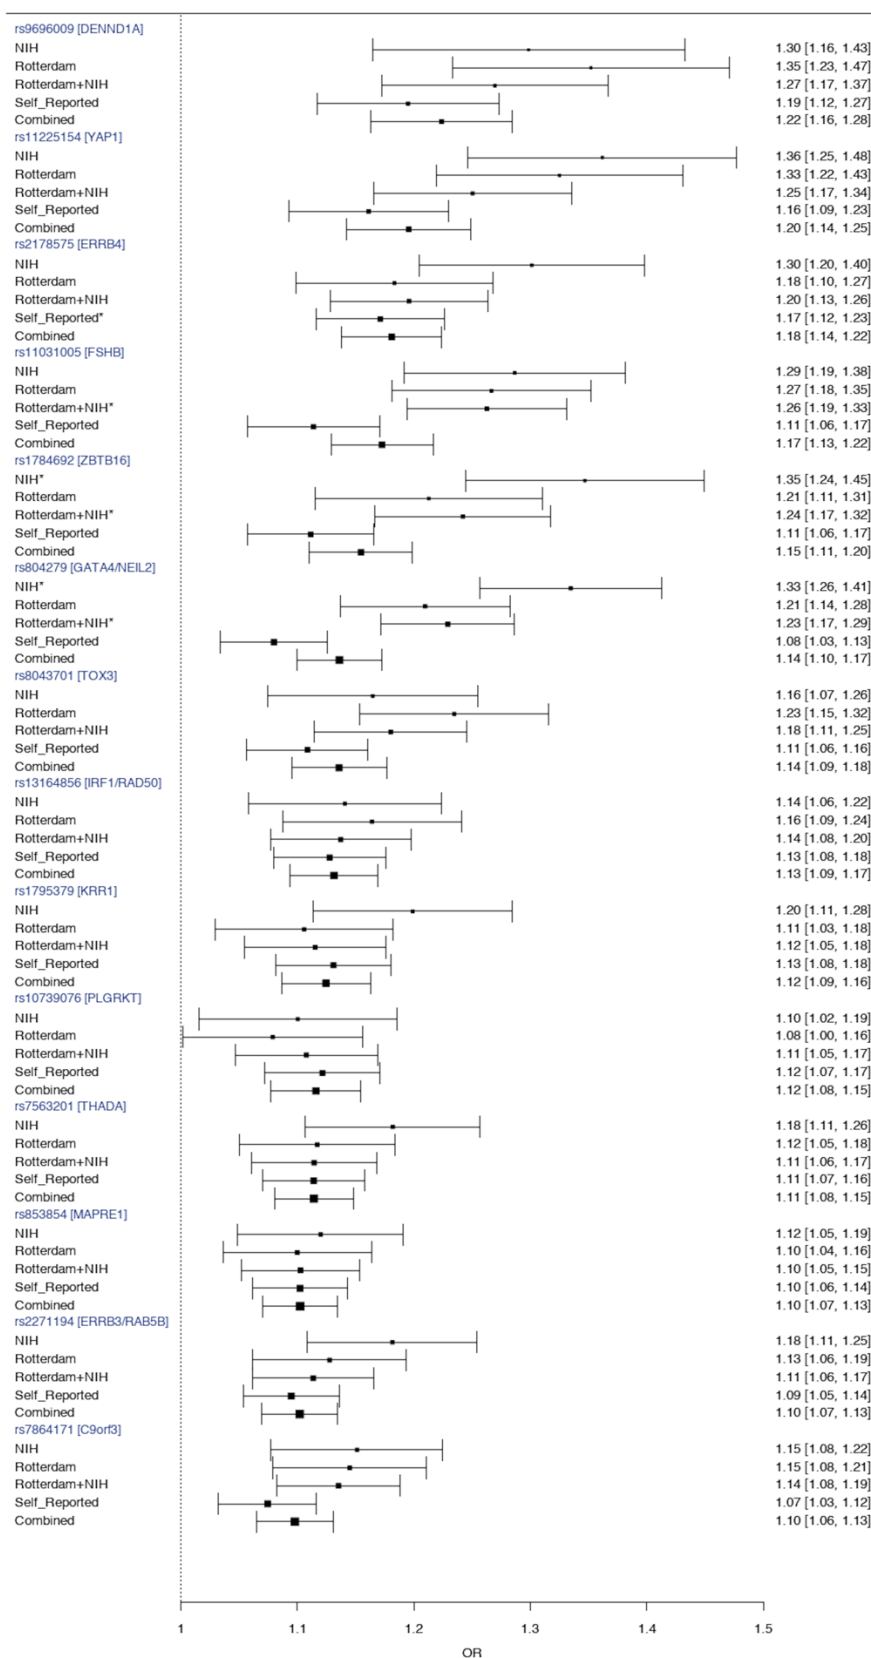

**Figure 2.** Odds ratio of polycystic ovary syndrome (PCOS) as a function of diagnostic criteria applied. The Y-axis specifies the diagnostic criteria and the X-axis indicates the odds ratio (OR) and 95% confidence intervals (CI) for PCOS (black circle and horizontal error bars). Data derived as follows: NIH=groups recruiting only NIH diagnostic criteria; Rotterdam=Rotterdam groups recruiting Rotterdam diagnostic criteria including the subset fulfilling NIH diagnostic criteria; Rotterdam+NIH=all groups except self-reported; self-reported=23andME; and combined= all groups. Specific OR's [95% CI, 5% CI] are indicated on the right. rs804279 in the GATA4/NEIL2 locus demonstrates significant heterogeneity (Het P = $2.9 \times 10^{-4}$ ). The \* indicates statistically significant association for PCOS and the variant in that specific stratum.



**Table 1.** Characteristics of PCOS cases and controls from each cohort included in the meta-analysis.

| Cohort             | Subject Type | Number | Age (years)         | BMI (kg/m <sup>2</sup> ) | PCOS Definition                                   | HA <sup>(1)</sup> n(%) | OD n(%)    | PCOM n(%)  |
|--------------------|--------------|--------|---------------------|--------------------------|---------------------------------------------------|------------------------|------------|------------|
| Rotterdam          | Cases**      | 1184   | 28.8 (4.8)          | 26.1 (6.3)               | NIH (41%) & Rotterdam (100%) <sup>(2)</sup>       | 439 (37.0)             | 946 (79.8) | 661 (55.8) |
|                    | Controls     | 5799   | 60.5 (7.9)          | 27.6 (4.7)               | Population Based Rotterdam Study                  | NA                     | NA         | NA         |
| UK (London/Oxford) | Cases**      | 670    | 32.1 (6.8)          | 28.2 (7.9)               | NIH (33%) & Rotterdam (100%) <sup>(2)</sup>       | 455 (67.9)             | 537 (80.1) | 383 (57.2) |
|                    | Controls     | 1379   | 45 (0) <sup>§</sup> | 26.8 (5.5)               | 1958 British Birth Cohort                         | NA                     | NA         | NA         |
| EGCUT              | Cases**      | 157    | 30.7 (8.2)          | 26.2 (6.7)               | Rotterdam <sup>(2)</sup>                          | NA                     | NA         | NA         |
|                    | Controls     | 2807   | 31.5 (7.3)          | 23.1 (5.5)               | Population Based                                  | NA                     | NA         | NA         |
| deCODE             | Cases**      | 658    | 41.3 (8.7)          | 30.1 (7.8)               | NIH (56%) & Rotterdam (100%) <sup>(2)</sup>       | 644 (97.9)             | 380 (57.7) | 507 (77.1) |
|                    | Controls     | 6774   | 49.0 (9.9)          | 25.1 (4.9)               | Population Based                                  | NA                     | NA         | NA         |
| Chicago            | Cases*       | 984    | 28.6 (5.5)          | 35.9 (8.5)               | NIH                                               | 984 (100)              | 984 (100)  | NA         |
|                    | Controls     | 2963   | 46.8 (15.2)         | 27.0 (7.4)               | Population Based NUGene                           | NA                     | NA         | NA         |
| Boston             | Cases*       | 485    | 28.4 (6.7)          | 30.8 (8.7)               | NIH                                               | 485 (100)              | 485 (100)  | 441 (90.9) |
|                    | Controls     | 407    | 27.2 (6.5)          | 23.8 (4.1)               | Screened controls <sup>(3)</sup>                  | 0                      | 0          | 177 (43.4) |
| 23andMe            | Cases***     | 5,184  | 45.1 (13.6)         | 29.2 (8.2)               | Self report (defined by questionnaire)            | NA                     | NA         | NA         |
|                    | Controls     | 82,759 | 51.1 (15.7)         | 26.1 (6.1)               | No PCOS by self report (defined by questionnaire) | NA                     | NA         | NA         |

(1) Clinical or Biochemical.

(2) Rotterdam diagnostic criteria include the NIH criteria. All subjects from the indicated cohorts were used in the Rotterdam analysis.

(3) Controls were screened for regular menses and no hyperandrogenism.

PCOS diagnosis was based on NIH criteria (\*), Rotterdam criteria (\*\*), or self report (\*\*\*). Results are reported as mean (SD) or a number (%). Abbreviations: BMI: body mass index, NA: not available, HA: hyperandrogenism, OD: ovulatory dysfunction, PCOM: polycystic ovarian morphology. <sup>§</sup>All subjects are from the British Birth Cohort (born in 1958).

**Table 2.** The 14 genome-wide significant variants associated with PCOS in the meta-analysis.

| Chr:Position <sup>1</sup> | rsID              | Alleles <sup>2</sup> | EAFF <sup>3</sup> | Beta          | Odds Ratio (95% CI) <sup>4</sup> | Std. Error    | Nearest Gene         | P-value          | Effective N <sup>5</sup> | Het P Value <sup>6</sup> |
|---------------------------|-------------------|----------------------|-------------------|---------------|----------------------------------|---------------|----------------------|------------------|--------------------------|--------------------------|
| 2:43561780                | rs7563201         | A/[G]                | 0.4507            | -0.1081       | 0.90 (0.87-0.93)                 | 0.0172        | <i>THADA</i>         | 3.678e-10        | 17192                    | 0.1843                   |
| 2:213391766               | rs2178575         | G/[A]                | 0.1512            | 0.1663        | 1.18 (1.13-1.23)                 | 0.0219        | <i>ERRB4</i>         | 3.344e-14        | 17192                    | 0.2772                   |
| 5:131813204               | rs13164856        | [T]/C                | 0.7291            | 0.1235        | 1.13 (1.09-1.18)                 | 0.0193        | <i>IRF1/RAD50</i>    | 1.453e-10        | 17192                    | 0.855                    |
| 8:11623889                | rs804279          | A/[T]                | 0.2616            | 0.1276        | 1.14 (1.10-1.18)                 | 0.0184        | <i>GATA4/NEIL2</i>   | 3.761e-12        | 16895                    | 0.00029                  |
| <b>9:5440589</b>          | <b>rs10739076</b> | <b>C/[A]</b>         | <b>0.3078</b>     | <b>0.1097</b> | <b>1.12 (1.07-1.16)</b>          | <b>0.0197</b> | <b><i>PLGRKT</i></b> | <b>2.510e-08</b> | <b>17192</b>             | <b>0.7643</b>            |
| 9:97723266                | rs7864171         | G/[A]                | 0.4284            | -0.0933       | 0.91 (0.88-0.94)                 | 0.0168        | <i>FANCC</i>         | 2.946e-08        | 17192                    | 0.02878                  |
| 9:126619233               | rs9696009         | G/[A]                | 0.0679            | 0.202         | 1.22 (1.15-1.30)                 | 0.0311        | <i>DENND1A</i>       | 7.958e-11        | 17192                    | 0.8619                   |
| 11:30226356               | rs11031005        | [T]/C                | 0.8537            | -0.1593       | 0.85 (0.82-0.89)                 | 0.0223        | <i>ARL14EP/FSHB</i>  | 8.664e-13        | 17192                    | 0.01984                  |
| 11:102043240              | rs11225154        | G/[A]                | 0.0941            | 0.1787        | 1.20 (1.13-1.26)                 | 0.0272        | <i>YAP1</i>          | 5.438e-11        | 17192                    | 0.1215                   |
| <b>11:113949232</b>       | <b>rs1784692</b>  | <b>[A]/G</b>         | <b>0.8237</b>     | <b>0.1438</b> | <b>1.15 (1.10-1.14)</b>          | <b>0.0226</b> | <b><i>ZBTB16</i></b> | <b>1.876e-10</b> | <b>17192</b>             | <b>0.0927</b>            |
| 12:56477694               | rs2271194         | A/[T]                | 0.416             | 0.0971        | 1.10 (1.07-1.14)                 | 0.0166        | <i>ERRB3/RAB5B</i>   | 4.568e-09        | 17192                    | 0.1915                   |
| 12:75941042               | rs1795379         | C/[T]                | 0.2398            | -0.1174       | 0.89 (0.86-0.92)                 | 0.0195        | <i>KRR1</i>          | 1.808e-09        | 17192                    | 0.2977                   |
| 16:52375777               | rs8043701         | [A]/T                | 0.815             | -0.1273       | 0.88 (0.85-0.92)                 | 0.0208        | <i>TOX3</i>          | 9.610e-10        | 17192                    | 0.2777                   |
| <b>20:31420757</b>        | <b>rs853854</b>   | <b>A/[T]</b>         | <b>.4989</b>      | <b>-.0975</b> | <b>0.91 (0.88-0.94)</b>          | <b>0.0163</b> | <b><i>MAPRE1</i></b> | <b>2.358e-09</b> | <b>17192</b>             | <b>0.6659</b>            |

<sup>1</sup>Chr - Chromosome:Position (bp) in hg19; <sup>2</sup>Alleles are shown as Major/Minor by allele frequency in 1000G EUR cohort, with the effect allele shown within [ ]; <sup>3</sup>Effect allele frequency; <sup>4</sup>95% Confidence Interval of the Odds Ratio; <sup>5</sup>Effective N - effective sample size; <sup>6</sup>Heterogeneity P Value - P Value for between-study heterogeneity (significant p<0.0036). Novel associations with PCOS not previously reported are shown in bold. EAF= Effect Allele Frequency.

**Table 3.** Association of PCOS GWAS Meta-analysis Susceptibility Variants and PCOS related traits.

| Chr:Position | rsID       | Gene                  | Ref.<br>allele | Other<br>allele | Hyperandrogenism |               |                | PCOM         |                | OD           |                |
|--------------|------------|-----------------------|----------------|-----------------|------------------|---------------|----------------|--------------|----------------|--------------|----------------|
|              |            |                       |                |                 | EAF              | Beta          | P-value        | Beta         | P-value        | Beta         | P-value        |
| 2:213391766  | rs2178575  | <i>ERRB4</i> *        | G              | A               | 0.83             | -0.126        | 4.3E-03        | <b>-0.24</b> | <b>1.4E-05</b> | <b>-0.23</b> | <b>1.2E-11</b> |
| 2:43561780   | rs7563201  | <i>THADA</i> *†       | G              | A               | 0.56             | 0.061         | 8.0E-02        | <b>0.16</b>  | <b>3.7E-04</b> | 0.08         | 1.5E-03        |
| 5:131813204  | rs13164856 | <i>IRF1/RAD50</i> *   | T              | C               | 0.73             | 0.092         | 1.8E-02        | 0.16         | 1.4E-03        | 0.08         | 5.6E-03        |
| 8:11623889   | rs804279   | <i>GATA4/NEIL2</i> *  | A              | T               | 0.27             | 0.126         | 8.7E-04        | <b>0.22</b>  | <b>1.5E-06</b> | <b>0.16</b>  | <b>9.9E-09</b> |
| 9:126619233  | rs9696009  | <i>DENND1A</i> †      | G              | A               | 0.94             | <b>-0.330</b> | <b>2.9E-07</b> | <b>-0.32</b> | <b>4.0E-05</b> | <b>-0.36</b> | <b>4.4E-15</b> |
| 9:5440589    | rs10739076 | <i>PLGRKT</i>         | A              | C               | 0.30             | 0.026         | 5.3E-01        | 0.10         | 5.9E-02        | 0.00         | 8.9E-01        |
| 9:97723266   | rs7864171  | <i>C9orf3</i> *†      | G              | A               | 0.60             | <b>0.124</b>  | <b>3.8E-04</b> | <b>0.19</b>  | <b>1.3E-05</b> | <b>0.10</b>  | <b>2.3E-04</b> |
| 11:30226356  | rs11031005 | <i>ARL14EP/FSHB</i> * | T              | C               | 0.85             | -0.079        | 8.2E-02        | -0.18        | 1.3E-03        | <b>-0.13</b> | <b>2.8E-04</b> |
| 11:102043240 | rs11225154 | <i>YAP1</i> *†        | G              | A               | 0.91             | -0.144        | 1.4E-02        | <b>-0.24</b> | <b>3.5E-04</b> | <b>-0.23</b> | <b>5.7E-08</b> |
| 11:113949232 | rs1784692  | <i>ZBTB16</i>         | T              | C               | 0.85             | 0.146         | 4.6E-03        | <b>0.30</b>  | <b>2.8E-06</b> | <b>0.21</b>  | <b>6.6E-09</b> |
| 12:75941042  | rs1795379  | <i>KRR1</i> *         | T              | C               | 0.24             | -0.104        | 8.0E-02        | -0.16        | 1.5E-03        | <b>-0.11</b> | <b>1.8E-04</b> |
| 12:56477694  | rs2271194  | <i>ERRB3/RAB5B</i> †  | A              | T               | 0.42             | <b>0.126</b>  | <b>2.7E-04</b> | <b>0.17</b>  | <b>7.9E-05</b> | <b>0.13</b>  | <b>1.4E-06</b> |
| 16:52375777  | rs8043701  | <i>TOX3</i> †         | A              | T               | 0.82             | <b>-0.166</b> | <b>1.4E-04</b> | -0.17        | 1.5E-03        | -0.08        | 9.2E-03        |
| 20:31420757  | rs853854   | <i>MAPRE1</i>         | T              | A               | 0.50             | 0.111         | 9.8E-04        | 0.10         | 2.1E-02        | 0.05         | 3.8E-02        |

Significant associations are highlighted in bold. Variant previously reported as a PCOS risk variant in \*European or †Han Chinese populations.

**Table 4.** LD Score regression results using the LDSC method.

| Phenotype                       | Genetic Correlation | SE     | Z      | P-value                |
|---------------------------------|---------------------|--------|--------|------------------------|
| Body mass index                 | 0.34                | 0.039  | 8.60   | $8.21 \times 10^{-18}$ |
| Childhood obesity               | 0.34                | 0.066  | 5.17   | $2.40 \times 10^{-7}$  |
| Fasting insulin levels          | 0.44                | 0.087  | 5.01   | $5.33 \times 10^{-7}$  |
| Type 2 diabetes                 | 0.31                | 0.068  | 4.47   | $7.84 \times 10^{-6}$  |
| High-density lipoprotein levels | -0.23               | 0.059  | -3.96  | $7.40 \times 10^{-5}$  |
| Menarche                        | -0.16               | 0.042  | -3.76  | $1.71 \times 10^{-4}$  |
| Triglyceride levels             | 0.19                | 0.052  | 3.61   | $3.05 \times 10^{-4}$  |
| Coronary artery disease         | 0.23                | 0.069  | 3.32   | $8.86 \times 10^{-4}$  |
| Depression                      | 0.205               | 0.0582 | 3.5203 | 0.0004                 |
| Menopause                       | -0.014              | 0.0183 | -0.762 | 0.4461                 |
| Male pattern balding            | 0.0149              | 0.0168 | 0.8861 | 0.3756                 |

**Table 5.** Mendelian randomization using an inverse weighted variant method.

| Potential Risk factor   | IVW method |       |                        |
|-------------------------|------------|-------|------------------------|
|                         | Beta       | SE    | P-value                |
| Body mass index         | 0.72       | 0.072 | $1.56 \times 10^{-23}$ |
| Fasting insulin levels* | 0.03       | 0.007 | $1.73 \times 10^{-5}$  |
| Male pattern balding    | 0.05       | 0.017 | 0.0034                 |
| Menopause               | 0.1        | 0.022 | $1.31 \times 10^{-5}$  |
| Depression              | 0.77       | 0.213 | 0.00029                |

\*Loci used were initially reported in an analysis of fasting insulin adjusted for BMI. IVW = inverse weighted variant.

## ONLINE METHODS

### Methods

#### *Subjects*

The meta-analysis included 10,074 cases and 103,164 controls from seven cohorts of European descent. For the analysis of PCOS related traits three additional cohorts, the Northern Finnish Birth Cohort (NFB66)<sup>39</sup>, Twins UK<sup>40</sup> and the Nurses' Health Study (NHS)<sup>41</sup> were included. Cases were diagnosed with PCOS based on NIH or Rotterdam Criteria or by self-report. The NIH criteria require the presence of both OD and clinical and/or biochemical HA for a diagnosis of PCOS<sup>6</sup>. The Rotterdam criteria require two out of three features 1) OD defined by oligo- or amenorrhea, 2) clinical and/or biochemical hyperandrogenism (HA) and/or 3) PCOM for a diagnosis of PCOS<sup>7</sup>. Self-reported cases from research participants in the 23andMe, Inc. (Mountain View, CA, USA) cohort either responded "yes" to the question "Have you ever been diagnosed with polycystic ovary syndrome?" or indicated a diagnosis of PCOS when asked about fertility ("Have you ever been diagnosed with PCOS?" or "What was your diagnosis? Please check all that apply." Answer=PCOS), hair loss in men or women ("Have you been diagnosed with any of the following? Please check all that apply." Answer=PCOS) or research question ("Have you ever been diagnosed with PCOS?")<sup>17</sup>.

HA was defined as hirsutism and quantified by the Ferriman-Gallwey (FG) score. The FG score assesses terminal hair growth in a male pattern in females, and a score above the upper limit of normal controls (>8) is considered hirsutism<sup>42</sup>. Hyperandrogenemia was defined as testosterone, androstenedione or DHEAS greater than the 95% confidence limits in control subjects in the individual population. OD was defined as cycle interval <21 or >35 days<sup>43</sup>. PCOM was defined as 12 or more follicles of 2-9 mm in at least one ovary or an ovarian volume >10 mL<sup>7</sup>. The quantitative PCOS traits included levels of total testosterone (T), follicle-stimulating

hormone (FSH), and luteinizing hormone (LH) and ovarian volume (Supplementary Table 1). An overview of the cohorts, diagnostic criteria and number of subjects included are summarized in Table 1 and Supplementary Table 1. All studies were approved by the Institutional Review Board at the recruiting site and all subjects signed written, informed consent.

### *Data Collection and Quality Control*

Each study provided summary results of genetic per-variant-estimates produced in either case-control or trait association analyses. The collected files underwent central quality control (QC) using the EasyQC pipeline<sup>44</sup>. Variants were excluded based on minor allele frequency (MAF) < 1%, imputation quality ( $R^2$ ) < 0.3 or info < 0.4 for MACH and IMPUTE2 respectively<sup>45,46</sup>.

### *Meta-analysis of PCOS status and PCOS related traits.*

The per-variant-estimates collected from the contributing studies were meta-analyzed using a fixed-effect, inverse-weighted-variance meta-analysis that employed either GWAMA<sup>47</sup> or METAL<sup>48</sup>. In addition to the overall meta-analysis, we performed meta-analyses for studies with available data for the separate PCOS diagnostic criteria: NIH, Rotterdam<sup>7</sup> and self-report<sup>17</sup>, as well as for the PCOS related traits of HA, OD and PCOM. The meta-analysis of PCOS status was performed using two models; (1) age-adjusted, (2) age and BMI-adjusted, given the high prevalence of obesity in affected women that resulted in cases being significantly heavier than controls in most cohorts (Table 1).

We removed any variants that were not present in more than 50% of the effective sample size prior to combining with 23andMe as this was the largest cohort in the meta-analysis, providing approximately 51% of the PCOS cases and 80% of controls. We also removed any variants only present in one study. The meta-analysis of PCOS

related traits was performed adjusting for age and BMI. Identified variants were annotated for insight into their biological function using ANNOVAR<sup>49</sup> to assign refGene gene information, SIFT score<sup>50</sup>, PolyPhen2 scores<sup>51</sup>, CADD scores<sup>52</sup>, GERP scores<sup>53</sup> and SiPhy log odds<sup>54</sup>.

### *Comparison of PCOS Diagnostic Criteria*

Since the Rotterdam diagnostic criteria include the NIH phenotype of OD and HA, the Rotterdam criteria cohorts included a subset of NIH phenotype cases, as indicated in Table 1. The Rotterdam criteria cohorts containing the NIH phenotype were compared to the NIH criteria cohorts for the analysis of the genetic architecture of the diagnostic criteria. We lacked adequate statistical power to compare the four PCOS phenotypes (Supplementary Figure 1) or to compare the NIH to the non-NIH Rotterdam phenotypes.

### *Identifying Associations Between PCOS Loci and PCOS related traits.*

In order to understand biology relevant to identified PCOS susceptibility, we assessed the association between index SNPs at each genome-wide-significant locus and the PCOS related traits HA, OD, PCOM as well as the quantitative traits testosterone, LH and FSH levels and ovarian volume. The threshold for significance in this analysis was  $p < 4.5 \times 10^{-4}$  (Bonferroni correction  $[0.05 / (14 \text{ independent loci} \times 8 \text{ traits})]$ ).

### *Identifying Shared Risk Loci Between European Ancestry and Han Chinese PCOS*

In order to identify shared risk loci between the previously reported GWAS in Han Chinese PCOS cases and our European ancestry cohort, 13 independent signals (represented by 15 SNPs) at 11 genome-wide significant loci reported by Chen *et al.*<sup>14</sup> and Shi *et al.*<sup>15</sup> were investigated for association in our meta-analyses of PCOS and PCOS related traits. The adjusted P-value for this analysis was  $< 0.00048$  (Bonferroni correction  $[0.05 / (13 \text{ independent signals} \times 8 \text{ traits})]$ ).



### *Biologic Function of Genes in Associated Loci*

Information on the biological function of the nearest gene (or genes, if variants were equidistant from more than one coding transcript and annotated as such by ANNOVAR<sup>49</sup> to the index SNP of each identified risk locus) was collected by performing a search of the Entrez Gene Database<sup>55</sup>, and collecting the co-ordinates of the gene (genome build 37; hg19) as well as the cytogenetic location and the summary of the gene function. In addition to the EntrezGene Database queries, the gene symbol was used as a search term in the PubMed database<sup>56</sup>, either alone or combined with the additional search term “PCOS” to identify relevant published literature in order to obtain information on putative biological function and involvement in the pathogenesis of PCOS (summarized in Supplementary Text Section 1.1).

### *Weighted genetic risk score and prediction*

One potential use of genetic risk scores is prediction of disease. The ability of genetic risk scores calculated from loci discovered in analysis of the different diagnostic criteria to discriminate cases from alternative criteria was measured. We constructed a weighted genetic risk score based on a meta-analysis excluding the Rotterdam Study subjects. The weighted genetic risk score was divided into quintiles and tested for association with PCOS in the Rotterdam cohort. The middle quintile was used as the reference and the odds for having PCOS based on both Rotterdam or NIH criteria was then calculated.

Additionally, the 23andMe results were used to select independent SNPs with cut-offs of  $p < 5 \times 10^{-4}$  to  $p < 5 \times 10^{-8}$ . The Rotterdam cohort was then used to calculate risk scores and the area-under-the curve (AUC) for both NIH and Rotterdam diagnostic criteria. Analyses were performed using PLINK v1.9 and SPSS v21 (IBM Corp, Armonk, NY)<sup>57</sup>

### *Linkage Disequilibrium (LD) Score Regression*

To assess the level of shared etiology between PCOS and related traits, we performed genetic correlation analysis using LD-score regression<sup>58</sup>. Publicly available genome-wide summary statistics for body mass index (BMI)<sup>59</sup>, childhood obesity<sup>60</sup>, fasting insulin levels (adjusted for BMI)<sup>61</sup>, type 2 diabetes<sup>62</sup>, high-density lipoprotein (HDL) levels<sup>63</sup>, menarche timing<sup>64</sup>, triglyceride levels<sup>63</sup>, coronary artery disease<sup>65</sup>, depression<sup>63</sup>, menopause<sup>17</sup> and male pattern balding<sup>66</sup> were used to estimate the genome-wide genetic correlation with PCOS. The adjusted P-value for this analysis was  $p < 0.0045$  after a Bonferroni correction ( $0.05/11$  traits).

### *Mendelian Randomization*

Phenotypes of interest, both where there was evidence of shared genetic architecture and where there was previous evidence for genetic links, were assessed using Mendelian randomization methods. Mendelian randomization differs from LD score regression in that one phenotype is analysed as a potential causal factor for another. Mendelian randomization was performed using both inverse weighted variance and Egger's regression methods<sup>67</sup>, with inverse weighted methods being more powerful, but Egger's methods being resistant to directional pleiotropy (where there are a set of SNPs that appear to have an alternative pathway of effect). In addition to the phenotypes implicated by the LD-score regression measures, male pattern balding has a strong biological rationale and was therefore included. The genetic score for childhood obesity substantially overlaps with the score for adult BMI (such that the INSIDE violation - where the effect of SNPs on a confounding factor scales with that on the trait of interest - of Mendelian randomization would likely occur<sup>68</sup>, so only a score for BMI was used, with the proviso that this represents BMI across the whole of the life course after very early infancy. The SNPs for Depression were drawn from the results of a more recent analysis, for which there was not, at time of analysis, publicly available genome-wide data.

### *Credible Sets*

We defined a locus as mapping within 500kb of the lead SNP. For each locus, we first calculated the posterior probability,  $\pi_{cj}$ , that the  $j$ th variant is driving the association, given by

$$\pi_{cj} = \frac{\Lambda_j}{\sum_k \Lambda_k}$$

where the summation is over all retained variants in the locus. In this expression,  $\Lambda_j$  is the approximate Bayes' factor<sup>69</sup> for the  $j$ th variant, given by

$$\Lambda_j = \sqrt{\frac{V_j}{V_j + \omega}} \exp \left[ \frac{\omega \beta_j^2}{2V_j(V_j + \omega)} \right]$$

where  $\beta_j$  and  $V_j$  denote the estimated allelic effect (log-OR) and corresponding variance from the meta-analysis. The parameter  $\omega$  denotes the prior variance in allelic effects, taken here to be 0.04<sup>69</sup>. The 99% credible set<sup>70</sup> for each signal was then constructed by: (i) ranking all variants according to their Bayes' factor,  $\Lambda_j$ ; and (ii) including ranked variants until their cumulative posterior probability of driving the association attained or exceeded 0.99.

## SUPPLEMENTARY MATERIALS

### SUPPLEMENTARY NOTES

#### 1.1. Supplementary Results.

In addition to these 14 significant loci, there was suggestive evidence of a 15th signal, rs151212108, near *ARSD* on the X chromosome. This SNP shows a relatively large effect size (OR:1.72, CI:1.43-2.07,  $P=8.35 \times 10^{-9}$ ). However, the SNP had low sample number (overall minor allele frequency=0.0765) with poor imputation quality and it was present in only three studies; Oxford, deCODE, and Chicago. Further, the signal showed nominally significant heterogeneity ( $P=0.028$ ) in the direction of effect estimates between Oxford, where the effect allele had a protective effect, and deCODE and Chicago, where the effect allele increased risk of PCOS. Thus, this signal was less robust than our other signals and will require further confirmation. Accordingly, we have not included this locus in downstream analyses. A detailed review of genes within reported loci is included in the Supplementary Notes (Section 1.2).

**1.2 Literature Lookup of genes at PCOS risk loci.** Summary of published literature on gene function of PCOS susceptibility loci.

**1. THADA (Thyroid Adenoma Associated); Located at 2p21 (Chr 2: 43561780-43561780).** Encodes a transcript of largely unknown function. THADA encodes thyroid adenoma-associated protein, which is expressed in pancreas, adrenal medulla, thyroid, adrenal cortex, testis, thymus, small intestine, and stomach<sup>71</sup>. This gene has been identified in GWAS for gestational weight gain, inflammatory bowel disease and PCOS and more specifically with the phenotype trait PCOM<sup>72,73</sup>,

<sup>73,74,14,71</sup>. THADA has been associated with endocrine and metabolic disturbances

commonly found in PCOS, such as increased LH, testosterone and LDL levels and T2D<sup>75</sup>. Proposed to modify PCOS risk through metabolic mechanisms<sup>76</sup>.

**2. ERBB4 (erb-b2 receptor tyrosine kinase 4; also known as HER4);**  
**Located at 2q33.3-q34.** Fourth member of the EGFR (epidermal growth factor *receptor*) family and the Tyr protein kinase family (USCS, GeneNetwork, RefSeq). Participates in the YAP/Hippo pathway, which regulates cell proliferation, differentiation and apoptosis and has been associated with the size of the primordial follicle pool in mice, female reproductive capacity in *Drosophila*, and it is hypothesized that disruption of Hippo signaling can promote follicle growth<sup>77-81</sup>. Tyrosine-protein kinase plays an essential role as cell surface receptor for neuregulins and EGF family members and regulates development of the heart, the central nervous system and the mammary gland<sup>82</sup>. HER4 is characterized by anti-proliferative and pro-apoptotic activity, is co-expressed in 90% of ER positive breast tumors. Proposed to modify PCOS risk through metabolic mechanisms<sup>76</sup>. Suggested to have a pathogenic role in cystogenesis in polycystic kidney disease<sup>83</sup>.

**3. IRF1 (interferon regulatory factor 1): Located at 5q31.1 (Chr5: 131813204-131813204);** Belongs to the interferon regulatory transcription factor (IRF) family. Activates the transcription of interferons alpha and beta, and genes induced by interferons alpha, beta and gamma (USCS, GeneNetwork, NCBI gene database). IRF1 displays a functional diversity in the regulation of cellular responses including host response to viral and bacterial infections, inflammation, and cell proliferation and differentiation, regulation of the cell cycle and induction of growth arrest and programmed cell death following DNA damage (UniProtKB). Acts as a tumor suppressor and plays a role not only in antagonism of tumor cell growth but also in stimulating an immune response against tumor cells<sup>84</sup>. It has been shown in fathead minnow that IRF1 may function as early molecular switches to control phenotypic

changes in ovary tissue architecture and function in response to androgen or antiandrogen exposure<sup>85</sup>.

**4. RAD50 (RAD50 homolog): Located at 5q31. (Chr5: 131892616-131980313);**

Rad50, a protein involved in DNA double-strand break repair<sup>82</sup>. This protein forms a complex with MRE11 and NBS1. The protein complex binds to DNA and displays numerous enzymatic activities that are required for non-homologous joining of DNA ends, and is important for DNA double-strand break repair<sup>86</sup>, telomere maintenance, and meiotic recombination<sup>87</sup>. Knockout studies of the mouse homolog suggest this gene is essential for cell growth and viability<sup>88</sup>.

**5. GATA4 (GATA binding protein 4): Located at 8p23.1-p22 (Chr 8: 11623889-11623889).**

GATA4 encodes a zinc-finger transcription factor that recognizes the GATA motif in the promoters of various genes (RefSeq). GATA4 is implicated in regulating granulosa cell differentiation, proliferation and function and is expressed in follicles, embryoid bodies and chorion of women with PCOS<sup>89</sup>. Knockdown of GATA4 and GATA6 impairs folliculogenesis and induces infertility<sup>30,90</sup>. The loss of GATA4 within the ovary results in impaired granulosa cell proliferation and theca cell recruitment<sup>91</sup>. Knockdown of both genes affects expression of FSH receptor, LH receptor, inhibin  $\alpha$  and  $\beta$ <sup>30,89</sup>. In rats with reproductive and metabolic abnormalities similar to PCOS, GATA4 has been associated with the biosynthesis and metabolism of steroids<sup>92</sup>. It is also proposed to modify PCOS risk through metabolic and inflammatory mechanisms<sup>76</sup>.

**6. PLGRKT (Plasminogen receptor, C-terminal lysine transmembrane protein):**

**Located at 9p24.1. (Chr 9; 5440339-5440839).** PLGRKT encodes a plasminogen receptor involved in regulating macrophage migration and regulates catecholamine release<sup>93</sup>. The region also includes genes for several members of the insulin

superfamily (INSL6, INSL4, RLN1, RLN2), which have roles in spermatogenesis, follicle growth and ovulation<sup>22,94</sup>.

**7. FANCC (Fanconi anemia, complementation group C): Located at: 9q22.3 (Chr 9: 97723266-97723266).** Member of the Fanconi anemia complementation group which, amongst others, includes FANCD1 (BRCA2). Members of the Fanconi anemia complementation group are related by their assembly into a common nuclear protein complex (RefSeq). This gene encodes the protein for complementation group C. Fanconi anemia is a recessive repair deficiency disorder, characterized by cytogenetic instability, hypersensitivity to DNA crosslinking agents, chromosomal breakage and defective DNA repair (UCSC, GeneNetwork). FANCC is a DNA repair protein that may operate in a post replication repair or a cell cycle checkpoint function<sup>82</sup>. May be implicated in interstrand DNA cross-link repair and in the maintenance of normal chromosome stability. Was recently shown to have a mitophagy function as well, and is required for clearance of damaged mitochondria<sup>95</sup>.

**8. C9orf3. Located at 9q22.32.** Has been previously associated with PCOS<sup>15</sup>. However, the region also includes genes for two hormones that regulate gluconeogenesis (FBP1, FBP2), and for PTCH1, which is a receptor for hedgehog proteins. In mice, the hedgehog signaling has been shown to be important for ovarian follicle development and is also implicated in the proliferation and steroidogenesis of theca cells<sup>96</sup>. This is supported by the association between rs4385527 in C9orf3 and anovulation, HA and polycystic ovarian morphology (PCOM)<sup>73</sup>.

**9. DENND1A (DENN/MADD domain-containing protein 1A): Located at 9q33.3 (Chr 9: 126619233-126619233).** Member of the connecdenn family and functions as a guanine nucleotide exchange factor involved for the early endosomal small GTPase RAB35 (UCSC, RefSeq). Regulates clathrin-mediated endocytosis (a major

mechanism for internalization of proteins and lipids) through RAB35 activation (USCS, RefSeq). DENND1A variant 2 (DENND1A.V2) protein and mRNA levels are increased in PCOS theca cells and play a key role in the hyperandrogenemia associated with PCOS<sup>97</sup>. The *DENND1A* locus has also been associated with PCOM and elevated serum insulin levels in PCOS women<sup>73,75</sup>. Some SNP's in DENND1A have even been associated with endometrioid carcinoma. It has been suggested that *DENND1A*, *LHCGR*, *INSR*, and *RAB5B* form a hierarchical signalling network that can influence androgen synthesis<sup>98</sup>.

**10. ARL14EP (ADP-ribosylation factor-like 14 effector protein): Located at 11p14.1.** Encodes an effector protein, which interacts with ADP-ribosylation factor-like 14 [ARL14], beta-actin and actin-based motor protein myosin 1E. ARL14 controls the export of major histocompatibility class II molecules by connecting to the actin network via this effector protein (RefSeq).

**11. FSHB (Follicle stimulating hormone, beta polypeptide): Located at 11p14.1 (Chr 11; 30226356-30226356).** FSHB is a member of the pituitary glycoprotein hormone family and encodes the  $\beta$ -subunit of the follicle-stimulating hormone (FSH) (RefSeq). FSH regulates folliculogenesis. FSHB polymorphisms influence early follicular phase FSH concentrations and IVF treatment outcome<sup>99</sup>. SNPs in the FSHB region are known to be associated with circulating FSH, LH and AMH levels but also with PCOS<sup>99-105</sup>. Overexpression of FSHB could cause polycystic ovary syndrome in women, whereas inactivating mutations of the FSHB gene, encoding for the hormone's unique  $\beta$ -subunit, cause infertility by primary amenorrhea<sup>106,107</sup>.

**12. YAP1 (Yes-associated protein 1): Located at 11q13 (Chr 11; 102043240-102043240).** YAP1 is an effector protein in the Hippo pathway involved in



development, growth, repair, and homeostasis (RefSeq). This pathway also plays a pivotal role in organ size control and tumor suppression by restricting proliferation and promoting apoptosis<sup>82</sup>. Has been associated with the size of the primordial follicle pool in mice, female reproductive capacity in *Drosophila*, and it is hypothesized that disruption of Hippo signaling can promote follicle growth<sup>79</sup>. The candidacy of YAP1 as a susceptibility gene for PCOS has been highlighted in several studies<sup>15,108,109</sup>.

**13. ZBTB16 (Zinc finger and BTB domain containing 16, also known as PLZF): Located at 11q23.1 (Chr 11; 113949232-113949232).** Member of the Krueppel C2H2-type zinc-finger protein family and encodes a zinc finger transcription factor that contains nine Kruppel-type zinc finger domains at the carboxyl terminus. This protein is located in the nucleus and is involved in cell cycle progression. The zinc finger protein has a pro-apoptotic and anti-proliferative activity and has been marked as an androgen-responsive gene with anti-proliferative activity in prostate cancer cells<sup>23</sup>. PLZF binds to the GATA4 gene regulatory region and activates GATA4 transcription and mediates cardiac hypertrophic signaling from angiotensin II receptor<sup>24</sup>. The loss of PLZF has been related to increased proliferation, invasiveness and motility, and resistance to apoptosis in different cancer cell types<sup>110</sup>. PLZF is considered a tumor suppressor gene in various cell types and tissues. Up-regulated during adipocyte differentiation *in vitro*<sup>25</sup>. Involved in control of early stages of spermatogenesis<sup>26</sup>, and critical for endometrial stromal cell decidualization<sup>27</sup>.

**14. ERBB3 (erb-b2 receptor tyrosine kinase 3; also known as HER3): Located at 12q13.** A member of the EGFR family of receptor tyrosine kinases (RefSeq). The ERBB3 gene is a potential susceptibility locus for T1D and has also been associated with PCOS<sup>15,111</sup>. ERBB4 together with ERBB3-binding protein 1 may modulate the protein cascade that leads to differentiation of ovarian somatic cells. ERBB3 interacts with the YAP protein in the Hippo pathway and is implicated in

ovarian cell tumors<sup>112</sup>. The same region also includes RAB5B and a SNP in this region has been associated with response to glucose stimulation<sup>113</sup>.

**15. RAB5B (Member of the RAS oncogene family): Located at 12q13.** Member of the RAS oncogene family. RAB5B is an isoform of RAB5, a member of the small G protein family. Rab5 regulates fusion and motility of early endosomes, and is a marker of the early endosome compartment<sup>114</sup>. Endogenous Rab5B may work in conjunction or in sequence with Rab5A to facilitate the trafficking of EGFR<sup>115</sup>. RAB5b has previously been identified in PCOS in women of Han Chinese and European descent<sup>109</sup>. A variant near this gene has been associated with insulin and glucose levels<sup>113</sup>. It has been suggested that *DENND1A*, *LHCGR*, *INSR*, and *RAB5B* form a hierarchical signaling network that can influence androgen synthesis<sup>98</sup>. Proposed to modify PCOS risk through metabolic mechanisms<sup>76</sup>. RAB5B shows lower expression levels in adipose tissue from PCOS women compared to healthy controls<sup>116</sup>.

**16. KRR1 (KRR1, small subunit (SSU) processome component, homolog (yeast)): Located at 12q21.2 (Chr 12; 75941042-75941042).** Required for 40S ribosome biogenesis. Involved in nucleolar processing of pre-18S ribosomal RNA and ribosome assembly (inferred function based on sequence similarity)<sup>82</sup>. The region also includes the testosterone- and estrogen-sensitive GLIPR1, GLIPR1L1 and GLIPR1L2 genes, which encode proteins involved in male germ cell maturation and sperm-oocyte binding<sup>117-119</sup>. Proposed to modify PCOS risk through metabolic mechanisms<sup>76</sup>.

**17. TOX3 (TOX high mobility group box family member 3): Located at 16q12.1.** This gene regulates Ca<sup>2+</sup>-dependent neuronal transcription through interaction with the cAMP-response-element-binding protein (CREB)<sup>120</sup>. The protein encoded by this gene contains an HMG-box, indicating that it may be involved in

bending and unwinding of DNA and alteration of chromatin structure (RefSeq). The C-terminus of the encoded protein is glutamine-rich due to CAG repeats in the coding sequence. A minor allele of this gene has been implicated in an elevated risk of breast cancer. In normal human tissues, TOX3 is largely expressed in the central nervous system (CNS), in the ileum, and within the brain in the frontal and occipital lobe. TOX3 overexpression induces transcription involving isolated estrogen-responsive elements and estrogen-responsive promoters, and protects neuronal cells from cell death caused by endoplasmic reticulum stress or BAX overexpression<sup>120</sup>. TOX3 has been highlighted as a potential PCOS susceptibility locus before and there is evidence it may modify the hyperandrogenemic aspects of the syndrome<sup>15,121</sup>. Proposed to modify PCOS risk through inflammatory mechanisms<sup>76</sup>.

**18. MAPRE1 (Microtubule-associated protein, RP/EB family, member 1, also known as EB1): Located at 20q11.1-q11.23 (Chr 20; 31420757-31420757).** EB1 interacts with the low-density lipoprotein receptor related protein 1 (LRP1), which controls adipogenesis<sup>28</sup> and may additionally mediate ovarian angiogenesis and follicle development<sup>29</sup>. EB1 binds to the plus end of microtubules and regulates the dynamics of the microtubule cytoskeleton<sup>82</sup>. It is thought that this protein is involved in suppression of microtubule dynamic instability, regulation of microtubule polymerization and spindle function, and chromosome stability (RefSeq).

**19. ARSD (arylsulfatase D): Located at Xp22.3 (X-chromosome; 2846021-2846021).** ARSD is a member of the sulfatase family and located within a cluster of similar arylsulfatase genes on chromosome X. The encoded proteins are essential for the correct composition of bone and cartilage matrix (RefSeq, GeneNetwork, USCS). This gene has been marked as a prognostic marker in chronic lymphocytic leukemia and has been suggested as a biological mechanism in chronic lymphocytic leukemia - CLL<sup>122</sup>. The Xp22.3 region also includes the gene for glycogenin 2 (GYG2), which is

involved in glycogen biosynthesis and blood glucose homeostasis. It has been shown that glycogen biosynthesis pathways are impaired in PCOS<sup>123,124</sup>.

### **Supplementary note on gene enrichment analysis.**

We used MAGENTA (Meta-analysis Gene-set Enrichment of Variant Associations; version 2.4;<sup>125</sup> and DEPICT (Data-driven Expression-Prioritized Integration for Complex Traits; release 142 for 1000 Genomes imputed data;<sup>126 127</sup> methods to specifically prioritize genes, pathways and tissues enriched in the genome-wide results of the PCOS meta-analysis. In brief, MAGENTA assesses the over-representation of genes with low P-values in their locus across manually curated databases. For the MAGENTA analysis, curated gene-sets and Gene Ontology (GO) gene-sets were obtained from the Molecular Signatures Database (MSigDB release v4.0;<sup>128</sup>). DEPICT prioritizes genes in the associated loci, detects enriched pathways and tissues based on derived data sets based on patterns of co-expression and the expression levels of the genes at associated loci. Further, we performed functional annotation enrichment analysis using GoShifter (Genomic Annotation Shifter;<sup>129</sup>). Functional annotations used in these analyses were transcription factor binding sites (172 transcription factors)<sup>130</sup> and chromatin states in different tissues (n=196)<sup>131</sup>. We investigated whether the 14 PCOS-associated susceptibility variants detected in this study and the variants in LD with them ( $r^2 > 0.6$ ) co-localized with specific functional annotations. The results from gene set analysis did not show results that we found particularly trustworthy, and the methods of MAGENTA have been criticized elsewhere so these are only reported in the supplement. No individual pathway appeared to be significant. GoShifter analyses for identification of enriched functional annotations did not reveal any statistically significant finding (all p-value > 0.05). DEPICT tissue identification approach reinforced the importance of ovarian morphology, with ovarian follicle, ovum, oocytes, ovary, granulosa cells, fallopian

tubes and cumulus cells all showing nominally significant p-values (p-value<0.05).

This is alongside the more general enrichment at endocrine cells and adipocytes.

The nominally significant findings for ovaries in the tissue identification analysis suggested the importance of ovarian morphology in PCOS pathogenesis. However, no individual pathway appeared to be significant in gene-set enrichment and gene prioritization analyses. A potential explanation for the lack of significant findings is that these methods are limited by the functional data available for the tissues relevant to PCOS and its related traits, e.g. ovary. In addition, DEPICT and GoShifter analyses were based on the 14 PCOS GWAS meta-analysis susceptibility variants, which may limit the power of these approaches to detect significant enrichments<sup>129</sup>.

## **SUPPLEMENTARY DATA**

### **Supplementary Tables:**

Supplementary Table 1: *Cohorts contributing polycystic ovary syndrome (PCOS) cases, PCOS phenotypes, laboratory data and controls.*

Supplementary Table 2: Fine-mapping of PCOS risk loci identified in the meta-analysis to narrow candidate causal variants.

Supplementary Table 3: Look-up of previously published PCOS risk variants in Han Chinese cohorts with PCOS GWAS meta-analysis and PCOS related traits (HA, OD, PCOM, T, FSH, LH and ovarian volume).

Supplementary Table 4: Look-up of PCOS GWAS meta-analysis susceptibility variants with PCOS related traits (HA, OD, PCOM, T, FSH, LH and ovarian volume).

## **Supplementary Figures:**

Supplementary Figure 1. Diagnostic criteria of PCOS results in four distinct PCOS phenotypes.

Supplementary Figure 2. Cluster plots showing relationships between PCOS loci and related traits.

Supplementary Figure 3: Weighted genetic risk score to predict odds of PCOS based on either Rotterdam or NIH criteria.

|                                       | NIH | Rotterdam |  |  |  |
|---------------------------------------|-----|-----------|--|--|--|
| Hyperandrogenemia or Hyperandrogenism |     |           |  |  |  |
| Ovulatory Dysfunction                 |     |           |  |  |  |
| Polycystic Ovarian Morphology         |     |           |  |  |  |

**Supplementary Figure 1.** Diagnostic criteria of PCOS. Columns represent the diagnostic phenotypes that result from different diagnostic criteria. Grey squares indicate required traits for diagnosis within each diagnostic phenotype.

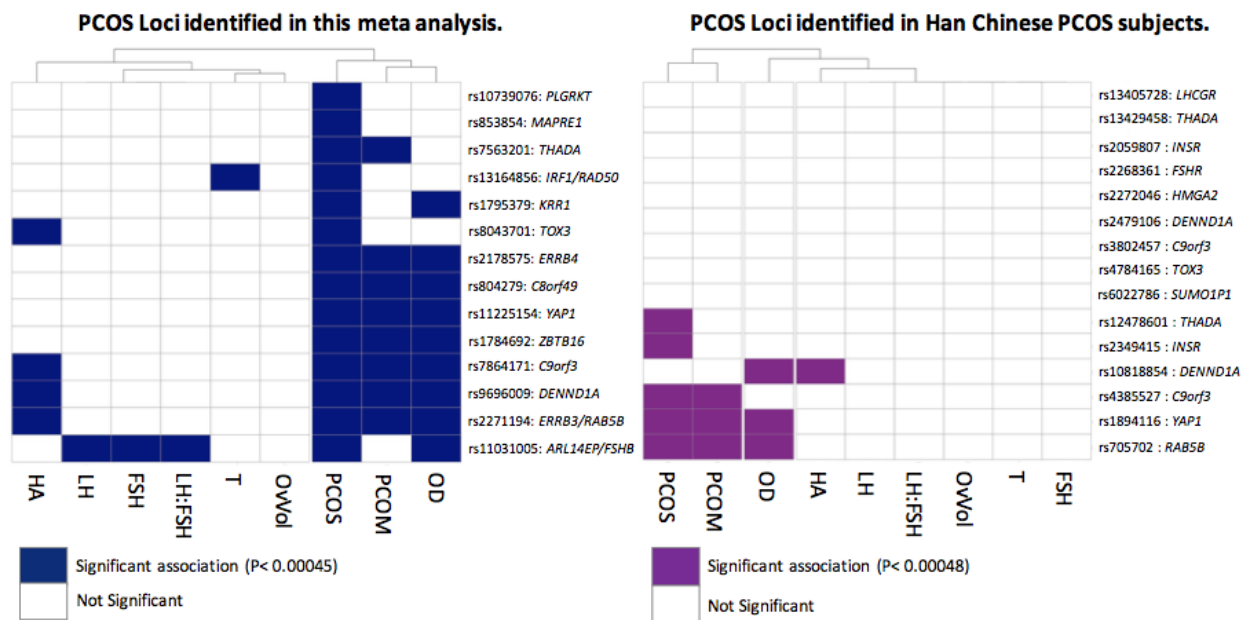

**Supplementary Figure 2. Cluster plots showing relationships between PCOS loci and related traits.** Loci significantly associated with PCOS in our meta analysis (shown on left, blue) or in the previously reported meta analyses of Chinese PCOS subjects in the analysis of related traits in our own meta (shown on right, purple). Clustering by column (phenotype/trait) demonstrates the large proportion of PCOS loci that are also significantly associated with ovulatory dysfunction (OD) and polycystic ovarian morphology (PCOM).



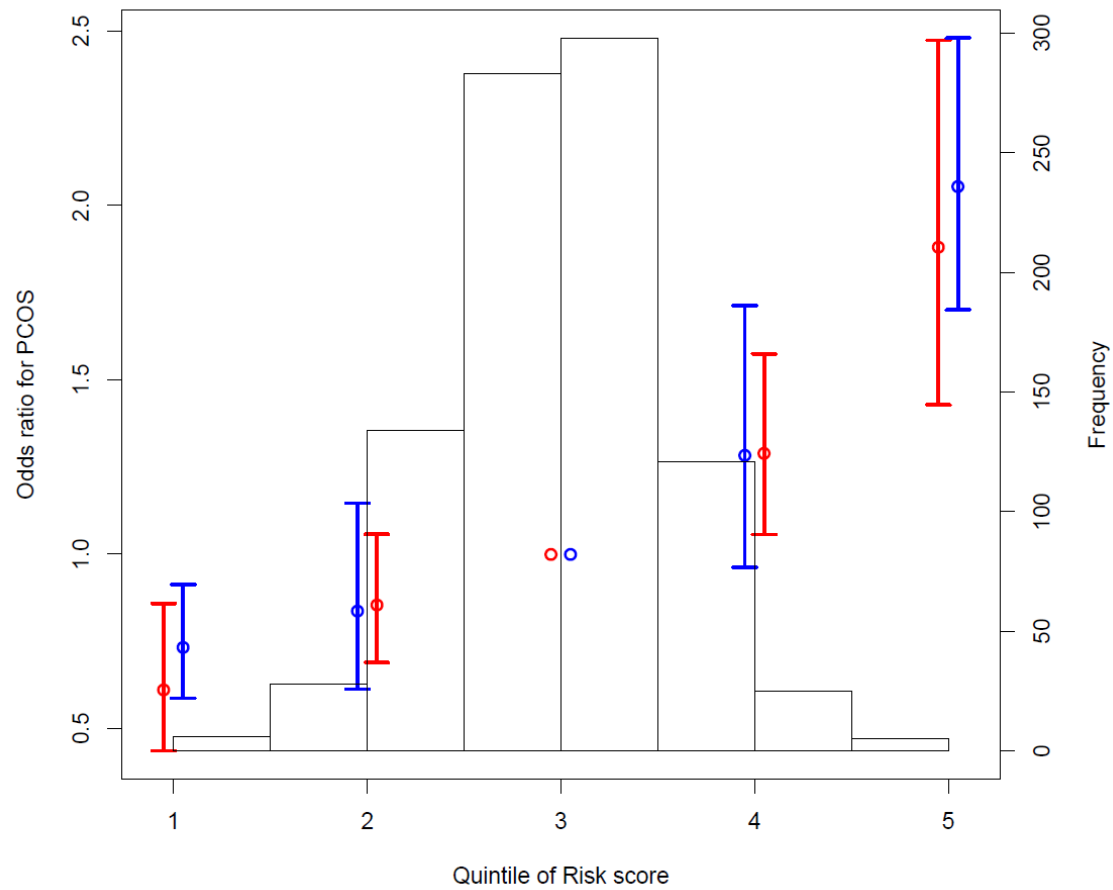

**Supplementary Figure 3: Weighted genetic risk score.** The odds for having PCOS by Rotterdam (blue) or NIH (red) diagnostic criteria based on genetic risk score from across the identified genome-wide significant loci. The group with the average number of risk alleles was used as the reference group.

## REFERENCES

1. Vink, J.M., Sadrzadeh, S., Lambalk, C.B. & Boomsma, D.I. Heritability of polycystic ovary syndrome in a Dutch twin-family study. *J Clin Endocrinol Metab* **91**, 2100-4 (2006).
2. Kahsar-Miller, M.D., Nixon, C., Boots, L.R., Go, R.C. & Azziz, R. Prevalence of polycystic ovary syndrome (PCOS) in first-degree relatives of patients with PCOS. *Fertil Steril* **75**, 53-8 (2001).
3. Legro, R.S., Driscoll, D., Strauss, J.F., 3rd, Fox, J. & Dunaif, A. Evidence for a genetic basis for hyperandrogenemia in polycystic ovary syndrome. *Proc Natl Acad Sci U S A* **95**, 14956-60 (1998).
4. Jahanfar, S., Eden, J.A., Nguyen, T., Wang, X.L. & Wilcken, D.E. A twin study of polycystic ovary syndrome and lipids. *Gynecol Endocrinol* **11**, 111-7 (1997).
5. Jahanfar, S., Eden, J.A., Warren, P., Seppala, M. & Nguyen, T.V. A twin study of polycystic ovary syndrome. *Fertil Steril* **63**, 478-86 (1995).
6. Zawadzki, J.K. & Dunaif, A. Diagnostic criteria for polycystic ovary syndrome: toward a rational approach. in *Polycystic ovary syndrome* (eds. Dunaif, A., Givens, J.R., Haseltine, F. & Merriam, G.R.) 377-84 (Blackwell Scientific Publications, Cambridge, 1992).
7. Rotterdam ESHRE/ASRM-Sponsored PCOS Consensus Workshop Group. Revised 2003 consensus on diagnostic criteria and long-term health risks related to polycystic ovary syndrome. *Fertil Steril* **81**, 19-25 (2004).
8. Knochauer, E.S. *et al.* Prevalence of the polycystic ovary syndrome in unselected black and white women of the southeastern United States: a prospective study. *J Clin Endocrinol Metab* **83**, 3078-82 (1998).
9. Tehrani, F.R., Simbar, M., Tohidi, M., Hosseini, F. & Azizi, F. The prevalence of polycystic ovary syndrome in a community sample of Iranian population: Iranian PCOS prevalence study. *Reprod Biol Endocrinol* **9**, 39 (2011).
10. March, W.A. *et al.* The prevalence of polycystic ovary syndrome in a community sample assessed under contrasting diagnostic criteria. *Hum Reprod* **25**, 544-51 (2010).
11. Yildiz, B.O., Bozdog, G., Yapici, Z., Esinler, I. & Yarali, H. Prevalence, phenotype and cardiometabolic risk of polycystic ovary syndrome under different diagnostic criteria. *Hum Reprod* **27**, 3067-73 (2012).
12. Diamanti-Kandarakis, E. & Dunaif, A. Insulin resistance and the polycystic ovary syndrome revisited: an update on mechanisms and implications. *Endocr Rev* **33**, 981-1030 (2012).
13. Cooney, L.G., Lee, I., Sammel, M.D. & Dokras, A. High prevalence of moderate and severe depressive and anxiety symptoms in polycystic ovary syndrome: a systematic review and meta-analysis. *Hum Reprod* **32**, 1075-1091 (2017).
14. Chen, Z.J. *et al.* Genome-wide association study identifies susceptibility loci for polycystic ovary syndrome on chromosome 2p16.3, 2p21 and 9q33.3. *Nat Genet* **43**, 55-9 (2011).
15. Shi, Y. *et al.* Genome-wide association study identifies eight new risk loci for polycystic ovary syndrome. *Nat Genet* **44**, 1020-5 (2012).
16. Hayes, M.G. *et al.* Genome-wide association of polycystic ovary syndrome implicates alterations in gonadotropin secretion in European ancestry populations. *Nat Commun* **6**, 7502 (2015).
17. Day, F.R. *et al.* Causal mechanisms and balancing selection inferred from genetic associations with polycystic ovary syndrome. *Nat Commun* **6**, 8464 (2015).
18. Carey, A.H. *et al.* Evidence for a single gene effect causing polycystic ovaries and male pattern baldness. *Clin Endocrinol (Oxf)* **38**, 653-8 (1993).
19. Fabre, D. *et al.* Identification of patients with impaired hepatic drug metabolism using a limited sampling procedure for estimation of phenazone (antipyrine) pharmacokinetic parameters. *Clin Pharmacokinet* **24**, 333-43 (1993).
20. Sanke, S., Chander, R., Jain, A., Garg, T. & Yadav, P. A Comparison of the Hormonal Profile of Early Androgenetic Alopecia in Men With the Phenotypic Equivalent of Polycystic Ovarian Syndrome in Women. *JAMA Dermatol* **152**, 986-91 (2016).

21. Govind, A., Obhrai, M.S. & Clayton, R.N. Polycystic ovaries are inherited as an autosomal dominant trait: analysis of 29 polycystic ovary syndrome and 10 control families. *J Clin Endocrinol Metab* **84**, 38-43 (1999).
22. Anand-Ivell, R. & Ivell, R. Regulation of the reproductive cycle and early pregnancy by relaxin family peptides. *Mol Cell Endocrinol* **382**, 472-9 (2014).
23. Jiang, F. & Wang, Z. Identification and characterization of PLZF as a prostatic androgen-responsive gene. *Prostate* **59**, 426-35 (2004).
24. Wang, N. *et al.* Promyelocytic leukemia zinc finger protein activates GATA4 transcription and mediates cardiac hypertrophic signaling from angiotensin II receptor 2. *PLoS One* **7**, e35632 (2012).
25. Ambele, M.A., Dessels, C., Durandt, C. & Pepper, M.S. Genome-wide analysis of gene expression during adipogenesis in human adipose-derived stromal cells reveals novel patterns of gene expression during adipocyte differentiation. *Stem Cell Res* **16**, 725-34 (2016).
26. Lovelace, D.L. *et al.* The regulatory repertoire of PLZF and SALL4 in undifferentiated spermatogonia. *Development* **143**, 1893-906 (2016).
27. Kommagani, R. *et al.* The Promyelocytic Leukemia Zinc Finger Transcription Factor Is Critical for Human Endometrial Stromal Cell Decidualization. *PLoS Genet* **12**, e1005937 (2016).
28. Masson, O. *et al.* LRP1 receptor controls adipogenesis and is up-regulated in human and mouse obese adipose tissue. *PLoS One* **4**, e7422 (2009).
29. Greenaway, J. *et al.* Thrombospondin-1 inhibits VEGF levels in the ovary directly by binding and internalization via the low density lipoprotein receptor-related protein-1 (LRP-1). *J Cell Physiol* **210**, 807-18 (2007).
30. Efimenko, E. *et al.* The transcription factor GATA4 is required for follicular development and normal ovarian function. *Dev Biol* **381**, 144-58 (2013).
31. Do, R., Kiss, R.S., Gaudet, D. & Engert, J.C. Squalene synthase: a critical enzyme in the cholesterol biosynthesis pathway. *Clin Genet* **75**, 19-29 (2009).
32. Chalasani, N. *et al.* Genome-wide association study identifies variants associated with histologic features of nonalcoholic Fatty liver disease. *Gastroenterology* **139**, 1567-76, 1576 e1-6 (2010).
33. Fauser, B.C. *et al.* Consensus on women's health aspects of polycystic ovary syndrome (PCOS): the Amsterdam ESHRE/ASRM-Sponsored 3rd PCOS Consensus Workshop Group. *Fertil Steril* **97**, 28-38.e25 (2012).
34. Welt, C.K. *et al.* Variants in DENND1A are associated with polycystic ovary syndrome in women of European ancestry. *J Clin Endocrinol Metab* **97**, E1342-7 (2012).
35. Ezech, U., Yildiz, B.O. & Azziz, R. Referral bias in defining the phenotype and prevalence of obesity in polycystic ovary syndrome. *J Clin Endocrinol Metab* **98**, E1088-96 (2013).
36. Norman, R.J., Masters, S. & Hague, W. Hyperinsulinemia is common in family members of women with polycystic ovary syndrome. *Fertil Steril* **66**, 942-7 (1996).
37. Cela, E. *et al.* Prevalence of polycystic ovaries in women with androgenic alopecia. *Eur J Endocrinol* **149**, 439-42 (2003).
38. Quinn, M. *et al.* Prevalence of androgenic alopecia in patients with polycystic ovary syndrome and characterization of associated clinical and biochemical features. *Fertil Steril* **101**, 1129-34 (2014).
39. Pinola, P. *et al.* Menstrual disorders in adolescence: a marker for hyperandrogenaemia and increased metabolic risks in later life? Finnish general population-based birth cohort study. *Hum Reprod* **27**, 3279-86 (2012).
40. Spector, T.D. & Williams, F.M. The UK Adult Twin Registry (TwinsUK). *Twin Res Hum Genet* **9**, 899-906 (2006).
41. Lindstrom, S. *et al.* A comprehensive survey of genetic variation in 20,691 subjects from four large cohorts. *PLoS One* **12**, e0173997 (2017).
42. Ferriman, D. & Gallwey, J.D. Clinical assessment of body hair growth in women. *J Clin Endocrinol Metab* **21**, 1440-7 (1961).
43. Solomon, C.G. *et al.* Long or highly irregular menstrual cycles as a marker for risk of type 2 diabetes mellitus. *JAMA* **286**, 2421-6 (2001).
44. Winkler, T.W. *et al.* Quality control and conduct of genome-wide association meta-analyses. *Nat Protoc* **9**, 1192-212 (2014).

45. Howie, B.N., Donnelly, P. & Marchini, J. A flexible and accurate genotype imputation method for the next generation of genome-wide association studies. *PLoS Genet* **5**, e1000529 (2009).
46. Scott, L.J. *et al.* A genome-wide association study of type 2 diabetes in Finns detects multiple susceptibility variants. *Science* **316**, 1341-5 (2007).
47. Magi, R. & Morris, A.P. GWAMA: software for genome-wide association meta-analysis. *BMC Bioinformatics* **11**, 288 (2010).
48. Willer, C.J., Li, Y. & Abecasis, G.R. METAL: fast and efficient meta-analysis of genomewide association scans. *Bioinformatics* **26**, 2190-1 (2010).
49. Wang, K., Li, M. & Hakonarson, H. ANNOVAR: functional annotation of genetic variants from high-throughput sequencing data. *Nucleic Acids Res* **38**, e164 (2010).
50. Saunders, C.T. & Baker, D. Evaluation of structural and evolutionary contributions to deleterious mutation prediction. *J Mol Biol* **322**, 891-901 (2002).
51. Adzhubei, I.A. *et al.* A method and server for predicting damaging missense mutations. *Nat Methods* **7**, 248-9 (2010).
52. Kircher, M. *et al.* A general framework for estimating the relative pathogenicity of human genetic variants. *Nat Genet* **46**, 310-5 (2014).
53. Davydov, E.V. *et al.* Identifying a high fraction of the human genome to be under selective constraint using GERP++. *PLoS Comput Biol* **6**, e1001025 (2010).
54. Garber, M. *et al.* Identifying novel constrained elements by exploiting biased substitution patterns. *Bioinformatics* **25**, i54-62 (2009).
55. Brown, G.R. *et al.* Gene: a gene-centered information resource at NCBI. *Nucleic Acids Res* **43**, D36-42 (2015).
56. Coordinators, N.R. Database Resources of the National Center for Biotechnology Information. *Nucleic Acids Res* **45**, D12-D17 (2017).
57. International Schizophrenia, C. *et al.* Common polygenic variation contributes to risk of schizophrenia and bipolar disorder. *Nature* **460**, 748-52 (2009).
58. Bulik-Sullivan, B.K. *et al.* LD Score regression distinguishes confounding from polygenicity in genome-wide association studies. *Nat Genet* **47**, 291-5 (2015).
59. Locke, A.E. *et al.* Genetic studies of body mass index yield new insights for obesity biology. *Nature* **518**, 197-206 (2015).
60. Felix, J.F. *et al.* Genome-wide association analysis identifies three new susceptibility loci for childhood body mass index. *Hum Mol Genet* **25**, 389-403 (2016).
61. Manning, A.K. *et al.* A genome-wide approach accounting for body mass index identifies genetic variants influencing fasting glycemic traits and insulin resistance. *Nat Genet* **44**, 659-69 (2012).
62. Morris, A.P. *et al.* Large-scale association analysis provides insights into the genetic architecture and pathophysiology of type 2 diabetes. *Nat Genet* **44**, 981-90 (2012).
63. Willer, C.J. *et al.* Discovery and refinement of loci associated with lipid levels. *Nat Genet* **45**, 1274-1283 (2013).
64. Perry, J.R. *et al.* Parent-of-origin-specific allelic associations among 106 genomic loci for age at menarche. *Nature* **514**, 92-97 (2014).
65. Nikpay, M. *et al.* A comprehensive 1,000 Genomes-based genome-wide association meta-analysis of coronary artery disease. *Nat Genet* **47**, 1121-1130 (2015).
66. Hagenaars, S.P. *et al.* Genetic prediction of male pattern baldness. *PLoS Genet* **13**, e1006594 (2017).
67. Yavorska, O.O. & Burgess, S. MendelianRandomization: an R package for performing Mendelian randomization analyses using summarized data. *Int J Epidemiol* **46**, 1734-1739 (2017).
68. Bowden, J. *et al.* Assessing the suitability of summary data for two-sample Mendelian randomization analyses using MR-Egger regression: the role of the I<sup>2</sup> statistic. *Int J Epidemiol* **45**, 1961-1974 (2016).
69. Wakefield, J. A Bayesian measure of the probability of false discovery in genetic epidemiology studies. *Am J Hum Genet* **81**, 208-27 (2007).
70. Wellcome Trust Case Control, C. *et al.* Bayesian refinement of association signals for 14 loci in 3 common diseases. *Nat Genet* **44**, 1294-301 (2012).
71. Goodarzi, M.O. *et al.* Replication of association of DENND1A and THADA variants with polycystic ovary syndrome in European cohorts. *J Med Genet* **49**, 90-5 (2012).
72. Stuebe, A.M. *et al.* Obesity and diabetes genetic variants associated with gestational weight gain. *Am J Obstet Gynecol* **203**, 283 e1-17 (2010).

73. Cui, L. *et al.* Polycystic ovary syndrome susceptibility single nucleotide polymorphisms in women with a single PCOS clinical feature. *Hum Reprod* **30**, 732-6 (2015).
74. Brower, M.A. *et al.* Further investigation in europeans of susceptibility variants for polycystic ovary syndrome discovered in genome-wide association studies of Chinese individuals. *J Clin Endocrinol Metab* **100**, E182-6 (2015).
75. Cui, L. *et al.* Genotype-phenotype correlations of PCOS susceptibility SNPs identified by GWAS in a large cohort of Han Chinese women. *Hum Reprod* **28**, 538-44 (2013).
76. Pau, C.T., Mosbrugger, T., Saxena, R. & Welt, C.K. Phenotype and Tissue Expression as a Function of Genetic Risk in Polycystic Ovary Syndrome. *PLoS One* **12**, e0168870 (2017).
77. Haskins, J.W., Nguyen, D.X. & Stern, D.F. Neuregulin 1-activated ERBB4 interacts with YAP to induce Hippo pathway target genes and promote cell migration. *Sci Signal* **7**, ra116 (2014).
78. Sudol, M. Neuregulin 1-activated ERBB4 as a "dedicated" receptor for the Hippo-YAP pathway. *Sci Signal* **7**, pe29 (2014).
79. Xiang, C. *et al.* Hippo signaling pathway reveals a spatio-temporal correlation with the size of primordial follicle pool in mice. *Cell Physiol Biochem* **35**, 957-68 (2015).
80. Sarikaya, D.P. & Extavour, C.G. The Hippo pathway regulates homeostatic growth of stem cell niche precursors in the Drosophila ovary. *PLoS Genet* **11**, e1004962 (2015).
81. Hsueh, A.J., Kawamura, K., Cheng, Y. & Fauser, B.C. Intraovarian control of early folliculogenesis. *Endocr Rev* **36**, 1-24 (2015).
82. The UniProt, C. UniProt: the universal protein knowledgebase. *Nucleic Acids Res* **45**, D158-D169 (2017).
83. Streets, A.J. *et al.* Parallel microarray profiling identifies ErbB4 as a determinant of cyst growth in ADPKD and a prognostic biomarker for disease progression. *Am J Physiol Renal Physiol* **312**, F577-F588 (2017).
84. Cohen, S. *et al.* Interferon regulatory factor 1 is an independent predictor of platinum resistance and survival in high-grade serous ovarian carcinoma. *Gynecol Oncol* **134**, 591-8 (2014).
85. Garcia-Reyero, N. *et al.* Expression signatures for a model androgen and antiandrogen in the fathead minnow (*Pimephales promelas*) ovary. *Environ Sci Technol* **43**, 2614-9 (2009).
86. Grenon, M., Gilbert, C. & Lowndes, N.F. Checkpoint activation in response to double-strand breaks requires the Mre11/Rad50/Xrs2 complex. *Nat Cell Biol* **3**, 844-7 (2001).
87. Zhang, Y., Zhou, J. & Lim, C.U. The role of NBS1 in DNA double strand break repair, telomere stability, and cell cycle checkpoint control. *Cell Res* **16**, 45-54 (2006).
88. Adelman, C.A., De, S. & Petrini, J.H. Rad50 is dispensable for the maintenance and viability of postmitotic tissues. *Mol Cell Biol* **29**, 483-92 (2009).
89. Bennett, J., Baumgarten, S.C. & Stocco, C. GATA4 and GATA6 silencing in ovarian granulosa cells affects levels of mRNAs involved in steroidogenesis, extracellular structure organization, IGF-I activity, and apoptosis. *Endocrinology* **154**, 4845-58 (2013).
90. Bennett, J., Wu, Y.G., Gossen, J., Zhou, P. & Stocco, C. Loss of GATA-6 and GATA-4 in granulosa cells blocks folliculogenesis, ovulation, and follicle stimulating hormone receptor expression leading to female infertility. *Endocrinology* **153**, 2474-85 (2012).
91. Padua, M.B., Fox, S.C., Jiang, T., Morse, D.A. & Tevosian, S.G. Simultaneous gene deletion of gata4 and gata6 leads to early disruption of follicular development and germ cell loss in the murine ovary. *Biol Reprod* **91**, 24 (2014).
92. Salilew-Wondim, D. *et al.* Polycystic ovarian syndrome is accompanied by repression of gene signatures associated with biosynthesis and metabolism of steroids, cholesterol and lipids. *J Ovarian Res* **8**, 24 (2015).
93. Lighvani, S. *et al.* Regulation of macrophage migration by a novel plasminogen receptor Plg-R KT. *Blood* **118**, 5622-30 (2011).
94. Burnicka-Turek, O. *et al.* Inactivation of insulin-like factor 6 disrupts the progression of spermatogenesis at late meiotic prophase. *Endocrinology* **150**, 4348-57 (2009).
95. Sumpter, R., Jr. *et al.* Fanconi Anemia Proteins Function in Mitophagy and Immunity. *Cell* **165**, 867-81 (2016).
96. Spicer, L.J. *et al.* The hedgehog-patched signaling pathway and function in the mammalian ovary: a novel role for hedgehog proteins in stimulating proliferation and steroidogenesis of theca cells. *Reproduction* **138**, 329-39 (2009).



97. McAllister, J.M. *et al.* Overexpression of a DENND1A isoform produces a polycystic ovary syndrome theca phenotype. *Proc Natl Acad Sci U S A* **111**, E1519-27 (2014).
98. McAllister, J.M., Legro, R.S., Modi, B.P. & Strauss, J.F., 3rd. Functional genomics of PCOS: from GWAS to molecular mechanisms. *Trends Endocrinol Metab* **26**, 118-24 (2015).
99. Laisk-Podar, T., Kaart, T., Peters, M. & Salumets, A. Genetic variants associated with female reproductive ageing--potential markers for assessing ovarian function and ovarian stimulation outcome. *Reprod Biomed Online* **31**, 199-209 (2015).
100. Ruth, K.S. *et al.* Genome-wide association study with 1000 genomes imputation identifies signals for nine sex hormone-related phenotypes. *Eur J Hum Genet* **24**, 284-90 (2016).
101. Grigorova, M. *et al.* Reproductive physiology in young men is cumulatively affected by FSH-action modulating genetic variants: FSHR -29G/A and c.2039 A/G, FSHB -211G/T. *PLoS One* **9**, e94244 (2014).
102. Hagen, C.P. *et al.* FSHB-211 and FSHR 2039 are associated with serum levels of follicle-stimulating hormone and antimüllerian hormone in healthy girls: a longitudinal cohort study. *Fertil Steril* **100**, 1089-95 (2013).
103. Schuring, A.N., Busch, A.S., Bogdanova, N., Gromoll, J. & Tuttelmann, F. Effects of the FSH-beta-subunit promoter polymorphism -211G->T on the hypothalamic-pituitary-ovarian axis in normally cycling women indicate a gender-specific regulation of gonadotropin secretion. *J Clin Endocrinol Metab* **98**, E82-6 (2013).
104. Tong, Y., Liao, W.X., Roy, A.C. & Ng, S.C. Association of Accl polymorphism in the follicle-stimulating hormone beta gene with polycystic ovary syndrome. *Fertil Steril* **74**, 1233-6 (2000).
105. Lee, H. *et al.* Genome-wide association study identified new susceptibility loci for polycystic ovary syndrome. *Hum Reprod* **30**, 723-31 (2015).
106. Matthews, C.H. *et al.* Primary amenorrhoea and infertility due to a mutation in the beta-subunit of follicle-stimulating hormone. *Nat Genet* **5**, 83-6 (1993).
107. Kumar, T.R., Wang, Y., Lu, N. & Matzuk, M.M. Follicle stimulating hormone is required for ovarian follicle maturation but not male fertility. *Nat Genet* **15**, 201-4 (1997).
108. Li, T. *et al.* Identification of YAP1 as a novel susceptibility gene for polycystic ovary syndrome. *J Med Genet* **49**, 254-7 (2012).
109. Louwers, Y.V., Stolk, L., Uitterlinden, A.G. & Laven, J.S. Cross-ethnic meta-analysis of genetic variants for polycystic ovary syndrome. *J Clin Endocrinol Metab* **98**, E2006-12 (2013).
110. Mariani, F. *et al.* PLZF expression during colorectal cancer development and in normal colorectal mucosa according to body size, as marker of colorectal cancer risk. *ScientificWorldJournal* **2013**, 630869 (2013).
111. Todd, J.A. *et al.* Robust associations of four new chromosome regions from genome-wide analyses of type 1 diabetes. *Nat Genet* **39**, 857-64 (2007).
112. Mukherjee, A. & Roy, S.K. Expression of ErbB3-binding protein-1 (EBP1) during primordial follicle formation: role of estradiol-17ss. *PLoS One* **8**, e67068 (2013).
113. Saxena, R. *et al.* Han Chinese polycystic ovary syndrome risk variants in women of European ancestry: relationship to FSH levels and glucose tolerance. *Hum Reprod* **30**, 1454-9 (2015).
114. Yun, H.J. *et al.* An early endosome regulator, Rab5b, is an LRRK2 kinase substrate. *J Biochem* **157**, 485-95 (2015).
115. Chen, P.I., Kong, C., Su, X. & Stahl, P.D. Rab5 isoforms differentially regulate the trafficking and degradation of epidermal growth factor receptors. *J Biol Chem* **284**, 30328-38 (2009).
116. Jones, M.R. *et al.* Systems genetics reveals the functional context of PCOS loci and identifies genetic and molecular mechanisms of disease heterogeneity. *PLoS Genet* **11**, e1005455 (2015).
117. Zhang, L.J. *et al.* Testosterone regulates thyroid cancer progression by modifying tumor suppressor genes and tumor immunity. *Carcinogenesis* **36**, 420-8 (2015).
118. Rasmussen, L.M. *et al.* Prolactin and oestrogen synergistically regulate gene expression and proliferation of breast cancer cells. *Endocr Relat Cancer* **17**, 809-22 (2010).

119. Gibbs, G.M. *et al.* Glioma pathogenesis-related 1-like 1 is testis enriched, dynamically modified, and redistributed during male germ cell maturation and has a potential role in sperm-oocyte binding. *Endocrinology* **151**, 2331-42 (2010).
120. Zhang, X. *et al.* A genetic polymorphism in TOX3 is associated with survival of gastric cancer in a Chinese population. *PLoS One* **8**, e72186 (2013).
121. Cui, Y. *et al.* Mutational analysis of TOX3 in Chinese Han women with polycystic ovary syndrome. *Reprod Biomed Online* **29**, 752-5 (2014).
122. Trojani, A. *et al.* Gene expression profiling identifies ARSD as a new marker of disease progression and the sphingolipid metabolism as a potential novel metabolism in chronic lymphocytic leukemia. *Cancer Biomark* **11**, 15-28 (2011).
123. Book, C.B. & Dunaif, A. Selective insulin resistance in the polycystic ovary syndrome. *J Clin Endocrinol Metab* **84**, 3110-6 (1999).
124. Wu, X.K. *et al.* Selective ovary resistance to insulin signaling in women with polycystic ovary syndrome. *Fertil Steril* **80**, 954-65 (2003).
125. Segre, A.V. *et al.* Common inherited variation in mitochondrial genes is not enriched for associations with type 2 diabetes or related glycemic traits. *PLoS Genet* **6**(2010).
126. Pers, T.H. *et al.* Biological interpretation of genome-wide association studies using predicted gene functions. *Nat Commun* **6**, 5890 (2015).
127. Genomes Project, C. *et al.* A map of human genome variation from population-scale sequencing. *Nature* **467**, 1061-73 (2010).
128. Subramanian, A. *et al.* Gene set enrichment analysis: a knowledge-based approach for interpreting genome-wide expression profiles. *Proc Natl Acad Sci U S A* **102**, 15545-50 (2005).
129. Trynka, G. *et al.* Disentangling the Effects of Colocalizing Genomic Annotations to Functionally Prioritize Non-coding Variants within Complex-Trait Loci. *Am J Hum Genet* **97**, 139-52 (2015).
130. Consortium, E.P. An integrated encyclopedia of DNA elements in the human genome. *Nature* **489**, 57-74 (2012).
131. Roadmap Epigenomics Consortium *et al.* Integrative analysis of 111 reference human epigenomes. *Nature* **518**, 317-30 (2015).
